# Supplementary material for: The Evolution of Diapsid Reproductive Strategy with Inferences about Extinct Taxa
Source: PubMed Central journal article supplement (PMC4938435; doi:10.1371/journal.pone.0158496), 2016-07-08
Supplement: pone.0158496.s001.pdf [file pone.0158496.s001.pdf]

| Species                              | Higher Taxon  | Family          | Body Mass (kg) | Clutch Volume (mm3) | Hatchling Precociality | Male Polygamy | Female Polygamy | Paternal Care (No = 0, Yes = 1) | Maternal Care (No = 0, Yes = 1) | Biiparental Care (No = 0, Yes = 1) | No Care (No = 0, Yes = 1) |
|--------------------------------------|---------------|-----------------|----------------|---------------------|------------------------|---------------|-----------------|---------------------------------|---------------------------------|------------------------------------|---------------------------|
| Sphenodon_punctatus                  | Sphenodontian | Sphenodontidae  | 0.366          | 44645               | 0                      | 1             | 1               | 0                               | 1                               | 0                                  | 0                         |
| Oedura_ocellata                      | Lacertilian   | Gekkonidae      | 0.0062         | 2144                | 0                      | 1             | 1               | 0                               | 0                               | 0                                  | 1                         |
| Oedura_castelnaui                    | Lacertilian   | Gekkonidae      | 0.0141         | 2695                | 0                      | 1             | 1               | 0                               | 0                               | 0                                  | 1                         |
| Plestiodon_chinensis                 | Lacertilian   | Scincidae       | 0.021          | 10570               | 0                      | 1             | 1               | 0                               | 1                               | 0                                  | 0                         |
| Plestiodon_fasciatus                 | Lacertilian   | Scincidae       | 0.0054         | 3400                | 0                      | 1             | 1               | 0                               | 1                               | 0                                  | 0                         |
| Podarcis_bocagei                     | Lacertilian   | Lacertidae      | 0.0025         | 972                 | 0                      | 1             | 1               | 0                               | 0                               | 0                                  | 1                         |
| Varanus_komodoensis                  | Lacertilian   | Varanidae       | 70             | 2425203             | 0                      | 1             | 1               | 0                               | 0                               | 0                                  | 1                         |
| Gambelia_wisizenii                   | Lacertilian   | Crotaphytidae   | 0.0364         | 13181.88            | 0                      | 1             | 1               | 0                               | 0                               | 0                                  | 1                         |
| Sceloporus_undulatus                 | Lacertilian   | Phrynosomatidae | 0.014          | 3840                | 0                      | 1             | 1               | 0                               | 0                               | 0                                  | 1                         |
| Sauromalus_varius                    | Lacertilian   | Iguanidae       | 0.171          | 63220               | 0                      | 1             | 1               | 0                               | 1                               | 0                                  | 0                         |
| Iguana_iguana                        | Lacertilian   | Iguanidae       | 0.575          | 291000              | 0                      | 1             | 0               | 0                               | 1                               | 0                                  | 0                         |
| Cyclura_pinguis                      | Lacertilian   | Iguanidae       | 3.021          | 783860              | 0                      | 1             | 1               | 0                               | 0                               | 0                                  | 1                         |
| Cyclura_carinata                     | Lacertilian   | Iguanidae       | 0.476          | 122080              | 0                      | 1             | 1               | 0                               | 1                               | 0                                  | 0                         |
| Cyclura_collei                       | Lacertilian   | Iguanidae       | 2.27           | 765400              | 0                      | 1             | 1               | 0                               | 0                               | 0                                  | 1                         |
| Cyclura_cyclura                      | Lacertilian   | Iguanidae       | 1.336          | 197294              | 0                      | 1             | 1               | 0                               | 1                               | 0                                  | 0                         |
| Cyclura_rileyi                       | Lacertilian   | Iguanidae       | 0.567          | 107900              | 0                      | 1             | 1               | 0                               | 0                               | 0                                  | 1                         |
| Cyclura_stejnegeri                   | Lacertilian   | Iguanidae       | 4.7            | 1308000             | 0                      | 1             | 1               | 0                               | 0                               | 0                                  | 1                         |
| Python_regius                        | Serpent       | Pythonidae      | 1.52           | 382680              | 0                      | 1             | 1               | 0                               | 1                               | 0                                  | 0                         |
| Python_sebae                         | Serpent       | Pythonidae      | 11.5           | 4774000             | 0                      | 1             | 1               | 0                               | 1                               | 0                                  | 0                         |
| Python_molurus                       | Serpent       | Pythonidae      | 29             | 7909120             | 0                      | 1             | 1               | 0                               | 1                               | 0                                  | 0                         |
| Python_reticulatus                   | Serpent       | Pythonidae      | 26             | 6592000             | 0                      | 1             | 1               | 0                               | 1                               | 0                                  | 0                         |
| Liasis_fuscus                        | Serpent       | Pythonidae      | 2.2            | 852798              | 0                      | 1             | 1               | 0                               | 1                               | 0                                  | 0                         |
| Morelia_amesthistina                 | Serpent       | Pythonidae      | 3              | 763000              | 0                      | 1             | 1               | 0                               | 1                               | 0                                  | 0                         |
| Morelia_pilota                       | Serpent       | Pythonidae      | 2.5            | 872770              | 0                      | 1             | 1               | 0                               | 1                               | 0                                  | 0                         |
| Antaresia_childreni                  | Serpent       | Pythonidae      | 0.6            | 124300              | 0                      | 1             | 1               | 0                               | 1                               | 0                                  | 0                         |
| Micrurus_fulvius                     | Serpent       | Elapidae        | 0.0338         | 17570               | 0                      | 1             | 1               | 0                               | 1                               | 0                                  | 0                         |
| Pseudechis_butleri                   | Serpent       | Elapidae        | 0.425          | 168060              | 0                      | 1             | 1               | 0                               | 1                               | 0                                  | 0                         |
| Naja_melanoleuca                     | Serpent       | Elapidae        | 1              | 396264              | 0                      | 1             | 1               | 0                               | 1                               | 0                                  | 0                         |
| Daidophis_punctatus_regalis          | Serpent       | Colubridae      | 0.037          | 8832                | 0                      | 1             | 1               | 0                               | 0                               | 0                                  | 1                         |
| Farancia_abacura                     | Serpent       | Colubridae      | 0.147          | 51870               | 0                      | 1             | 1               | 0                               | 1                               | 0                                  | 0                         |
| Hypsiglena_ochrorhyncha_ochrorhyncha | Serpent       | Colubridae      | 0.03           | 10254               | 0                      | 1             | 1               | 0                               | 0                               | 0                                  | 1                         |
| Tropidonophis_mairii                 | Serpent       | Colubridae      | 0.1114         | 26482               | 0                      | 1             | 1               | 0                               | 1                               | 0                                  | 0                         |
| Masticophis_bilineatus               | Serpent       | Colubridae      | 0.165          | 62586               | 0                      | 1             | 1               | 0                               | 0                               | 0                                  | 1                         |
| Ptyas_mucosus                        | Serpent       | Colubridae      | 0.658          | 362000              | 0                      | 1             | 1               | 0                               | 1                               | 0                                  | 0                         |
| Elaphe_guttata                       | Serpent       | Colubridae      | 0.123          | 63000               | 0                      | 1             | 1               | 0                               | 1                               | 0                                  | 0                         |
| Rhinocheilus_lecontei                | Serpent       | Colubridae      | 0.055          | 16329               | 0                      | 1             | 1               | 0                               | 0                               | 0                                  | 1                         |
| Lampropeltis_trianguulum             | Serpent       | Colubridae      | 0.065          | 42950               | 0                      | 1             | 1               | 0                               | 0                               | 0                                  | 1                         |
| Emydura_macquarii                    | Chelonian     | Chelidae        | 1.95           | 64879.97            | 0                      | 1             | 1               | 0                               | 0                               | 0                                  | 1                         |
| Pseudemys_scripta_troostii           | Chelonian     | Emydidae        | 1.122          | 84446.52            | 0                      | 1             | 1               | 0                               | 0                               | 0                                  | 1                         |
| Chrysemys_rubriventris               | Chelonian     | Emydidae        | 3.477          | 129838.4            | 0                      | 1             | 1               | 0                               | 0                               | 0                                  | 1                         |
| Chelydra_serpentina                  | Chelonian     | Chelydridae     | 4.4            | 373196.35           | 0                      | 1             | 1               | 0                               | 0                               | 0                                  | 1                         |
| Dermochelys_coriacea                 | Chelonian     | Dermochelyidae  | 332.7          | 6495550             | 0                      | 1             | 1               | 0                               | 0                               | 0                                  | 1                         |
| Chelonia_mydas                       | Chelonian     | Cheloniidae     | 61.5           | 5166240             | 0                      | 1             | 1               | 0                               | 0                               | 0                                  | 1                         |
| Natator_depressus                    | Chelonian     | Cheloniidae     | 74.4           | 3717196.41          | 0                      | 1             | 1               | 0                               | 0                               | 0                                  | 1                         |
| Eretmochelys_imbricata               | Chelonian     | Cheloniidae     | 50             | 3731000             | 0                      | 1             | 1               | 0                               | 0                               | 0                                  | 1                         |
| Caretta_caretta                      | Chelonian     | Cheloniidae     | 113            | 4068880             | 0                      | 1             | 1               | 0                               | 0                               | 0                                  | 1                         |
| Lepidochelys_kempi                   | Chelonian     | Cheloniidae     | 38.2           | 3388000             | 0                      | 1             | 1               | 0                               | 0                               | 0                                  | 1                         |
| Lepidochelys_olivacea                | Chelonian     | Cheloniidae     | 38.1           | 3494820             | 0                      | 1             | 1               | 0                               | 0                               | 0                                  | 1                         |
| Alligator_mississippiensis           | Crocodylian   | Alligatoridae   | 47.8           | 2540000             | 1                      | 0             | 0               | 0                               | 1                               | 0                                  | 0                         |
| Paleosuchus_palpebrosus              | Crocodylian   | Alligatoridae   | 5.9            | 811000              | 1                      | 0             | 0               | 0                               | 1                               | 0                                  | 0                         |
| Paleosuchus_trigonatus               | Crocodylian   | Alligatoridae   | 7.5            | 1150000             | 1                      | 0             | 0               | 0                               | 1                               | 0                                  | 0                         |
| Caiman_yacare                        | Crocodylian   | Alligatoridae   | 13             | 2230000             | 1                      | 0             | 0               | 0                               | 1                               | 0                                  | 0                         |
| Caiman_latirostris                   | Crocodylian   | Alligatoridae   | 14.6           | 2300000             | 1                      | 0             | 0               | 0                               | 0                               | 1                                  | 0                         |
| Melanosuchus_niger                   | Crocodylian   | Alligatoridae   | 82             | 4120000             | 1                      | 0             | 0               | 0                               | 1                               | 0                                  | 0                         |
| Gavialis_gangeticus                  | Crocodylian   | Gavialidae      | 147            | 7870000             | 1                      | 1             | 0               | 0                               | 1                               | 0                                  | 0                         |
| Tomistoma_schlegelii                 | Crocodylian   | Gavialidae      | 119            | 5380000             | 0                      | 0             | 0               | 0                               | 1                               | 0                                  | 0                         |
| Osteolaemus_tetraspis                | Crocodylian   | Crocodylidae    | 18.8           | 556000              | 1                      | 0             | 0               | 0                               | 1                               | 0                                  | 0                         |
| Crocodylus_porosus                   | Crocodylian   | Crocodylidae    | 78.7           | 5420000             | 1                      | 0             | 0               | 0                               | 1                               | 0                                  | 0                         |
| Crocodylus_palustris                 | Crocodylian   | Crocodylidae    | 42.7           | 1950000             | 1                      | 0             | 0               | 0                               | 1                               | 0                                  | 0                         |
| Crocodylus_moreletti                 | Crocodylian   | Crocodylidae    | 31.7           | 2710000             | 1                      | 0             | 0               | 0                               | 1                               | 0                                  | 0                         |
| Crocodylus_acutus                    | Crocodylian   | Crocodylidae    | 76.7           | 2600000             | 1                      | 0             | 0               | 0                               | 0                               | 1                                  | 0                         |
| Crocodylus_intermedius               | Crocodylian   | Crocodylidae    | 108            | 4970000             | 1                      | 0             | 0               | 0                               | 1                               | 0                                  | 0                         |
| Crocodylus_johnstoni                 | Crocodylian   | Crocodylidae    | 19.5           | 756000              | 1                      | 0             | 0               | 0                               | 1                               | 0                                  | 0                         |
| Crocodylus_cataphractus              | Crocodylian   | Crocodylidae    | 50.5           | 2290000             | 1                      | 0             | 0               | 0                               | 1                               | 0                                  | 0                         |
| Crocodylus_niloticus                 | Crocodylian   | Crocodylidae    | 94.2           | 4310000             | 1                      | 0             | 0               | 0                               | 0                               | 1                                  | 0                         |
| Crocodylus_novaeguineae              | Crocodylian   | Crocodylidae    | 39.9           | 2160000             | 1                      | 0             | 0               | 0                               | 0                               | 1                                  | 0                         |
| Crocodylus_mindorensis               | Crocodylian   | Crocodylidae    | 36.9           | 997000              | 1                      | 0             | 0               | 0                               | 0                               | 1                                  | 0                         |
| Pterosauria                          | Pterosaur     | Pterosauria     | NA             | NA                  | 1 NA                   | NA            | NA              | 0                               | 0                               | 0                                  | 1                         |
| Massospondylus                       | Dinosaur      | Sauropodomorph  | 107            | 678000              | 1 NA                   | NA            | NA              | 0                               | 0                               | 0                                  | 1                         |
| Megaloolithus_patagonicus            | Dinosaur      | Sauropodomorph  | 5000           | 38500000            | 1 NA                   | NA            | NA              | 0                               | 0                               | 0                                  | 1                         |
| Megaloolithus_sirguae                | Dinosaur      | Sauropodomorph  | 10000          | 41500000            | 1 NA                   | NA            | NA              | 0                               | 0                               | 0                                  | 1                         |
| Citipati_osmolskae                   | Dinosaur      | Theropod        | 79.23          | 8767000             | 1 NA                   | NA            | NA              | 1                               | 0                               | 0                                  | 0                         |
| Oviraptor_philoceratops              | Dinosaur      | Theropod        | 39             | 7140000             | 1 NA                   | NA            | NA              | 1                               | 0                               | 0                                  | 0                         |

|                           |                                             |                  |        |          |   |    |    |   |   |   |   |
|---------------------------|---------------------------------------------|------------------|--------|----------|---|----|----|---|---|---|---|
| Troodon_formosus          | Dinosaur                                    | Theropod         | 51.4   | 7584000  | 1 | NA | NA | 1 | 0 | 0 | 0 |
| Byronosaurus_jaffei       | Dinosaur                                    | Theropod         | 22.5   | 3240000  | 1 | NA | NA | 1 | 0 | 0 | 0 |
| Struthio_camelus          | Paleognaths                                 | Struthionidae    | 111    | 22100000 | 1 | 1  | 1  | 0 | 0 | 1 | 0 |
| Rhea_pennata              | Paleognaths                                 | Rheidae          | 20     | 9804900  | 1 | 1  | 1  | 0 | 0 | 0 | 0 |
| Rhea_americana            | Paleognaths                                 | Rheidae          | 23     | 6600000  | 1 | 1  | 1  | 0 | 0 | 0 | 0 |
| Dromaius_novaehollandiae  | Paleognaths                                 | Dromaiidae       | 34.2   | 5140000  | 1 | 0  | 1  | 1 | 0 | 0 | 0 |
| Casuaris_casuaris         | Paleognaths                                 | Casuariidae      | 45.1   | 3220000  | 1 | 0  | 1  | 1 | 0 | 0 | 0 |
| Apteryx_australis         | Paleognaths                                 | Apterygidae      | 2.33   | 617000   | 1 | 0  | 0  | 1 | 0 | 0 | 0 |
| Apteryx_owenii            | Paleognaths                                 | Apterygidae      | 1.11   | 317000   | 1 | 0  | 0  | 1 | 0 | 0 | 0 |
| Eudromia_elegans          | Paleognaths                                 | Tinamidae        | 0.704  | 263000   | 1 | 1  | 1  | 1 | 0 | 0 | 0 |
| Rhynchotus_rufescens      | Paleognaths                                 | Tinamidae        | 0.845  | 265000   | 1 | 1  | 1  | 1 | 0 | 0 | 0 |
| Nothura_maculosa          | Paleognaths                                 | Tinamidae        | 0.258  | 109000   | 1 | 1  | 1  | 1 | 0 | 0 | 0 |
| Nothura_darwini           | Paleognaths                                 | Tinamidae        | 0.246  | 122000   | 1 | 1  | 1  | 1 | 0 | 0 | 0 |
| Nothoprocta_cinereascens  | Paleognaths                                 | Tinamidae        | 0.526  | 325000   | 1 | 1  | 1  | 1 | 0 | 0 | 0 |
| Nothoprocta_ornata        | Paleognaths                                 | Tinamidae        | 0.622  | 252000   | 1 | 1  | 1  | 1 | 0 | 0 | 0 |
| Nothoprocta_perdicaria    | Paleognaths                                 | Tinamidae        | 0.458  | 212000   | 1 | 1  | 1  | 1 | 0 | 0 | 0 |
| Nothocercus_bonapartei    | Paleognaths                                 | Tinamidae        | 0.925  | 637000   | 1 | 1  | 1  | 1 | 0 | 0 | 0 |
| Nothocercus_julius        | Paleognaths                                 | Tinamidae        | 0.2114 | 911040   | 0 | 1  | 0  | 1 | 0 | 0 | 0 |
| Tinamus_major             | Paleognaths                                 | Tinamidae        | 1.03   | 307000   | 1 | 1  | 1  | 1 | 0 | 0 | 0 |
| Tinamus_osgoodi           | Paleognaths                                 | Tinamidae        | 1.29   | 197000   | 1 | 1  | 1  | 1 | 0 | 0 | 0 |
| Tinamus_tao               | Paleognaths                                 | Tinamidae        | 1.6    | 610000   | 1 | 1  | 1  | 1 | 0 | 0 | 0 |
| Tinamus_solitarius        | Paleognaths                                 | Tinamidae        | 1.39   | 486000   | 1 | 1  | 1  | 1 | 0 | 0 | 0 |
| Crypturellus_tataupa      | Paleognaths                                 | Tinamidae        | 0.22   | 93800    | 1 | 1  | 1  | 1 | 0 | 0 | 0 |
| Crypturellus_parvirostris | Paleognaths                                 | Tinamidae        | 0.22   | 74400    | 1 | 1  | 1  | 1 | 0 | 0 | 0 |
| Crypturellus_soui         | Paleognaths                                 | Tinamidae        | 0.207  | 43600    | 1 | 1  | 1  | 1 | 0 | 0 | 0 |
| Crypturellus_variegatus   | Paleognaths                                 | Tinamidae        | 0.317  | 30400    | 1 | 1  | 1  | 1 | 0 | 0 | 0 |
| Crypturellus_strigulosus  | Paleognaths                                 | Tinamidae        | 0.431  | 136000   | 1 | 1  | 1  | 1 | 0 | 0 | 0 |
| Crypturellus_undulatus    | Paleognaths                                 | Tinamidae        | 0.567  | 210000   | 1 | 1  | 1  | 1 | 0 | 0 | 0 |
| Crypturellus_cinnamomeus  | Paleognaths                                 | Tinamidae        | 0.422  | 224000   | 1 | 1  | 1  | 1 | 0 | 0 | 0 |
| Chauna_torquata           | Galloanserae                                | Anhimidae        | 4.4    | 513000   | 1 | 0  | 0  | 0 | 0 | 1 | 0 |
| Somateria_mollissima      | Galloanserae                                | Anatidae         | 2.07   | 475000   | 1 | 0  | 0  | 0 | 1 | 0 | 0 |
| Anas_platyrhynchos        | Galloanserae                                | Anatidae         | 1.14   | 542000   | 1 | 0  | 0  | 0 | 1 | 0 | 0 |
| Anser_anser               | Galloanserae                                | Anatidae         | 3.31   | 797000   | 1 | 0  | 0  | 0 | 0 | 1 | 0 |
| Cygnus_olor               | Galloanserae                                | Anatidae         | 10.7   | 1750000  | 1 | 0  | 0  | 0 | 0 | 1 | 0 |
| Cygnus_buccinator         | Galloanserae                                | Anatidae         | 11.1   | 1443667  | 1 | 0  | 0  | 0 | 0 | 1 | 0 |
| Alectura_lathamii         | Galloanserae                                | Megapodiidae     | 2.34   | 2580000  | 0 | 1  | 1  | 1 | 0 | 0 | 0 |
| Leipoa_ocellata           | Galloanserae                                | Megapodiidae     | 1.8    | 2710000  | 0 | 0  | 0  | 0 | 1 | 0 | 0 |
| Crax_rubra                | Galloanserae                                | Cracidae         | 4.13   | 358000   | 1 | 0  | 0  | 0 | 1 | 0 | 0 |
| Acryllium_vulturinum      | Galloanserae                                | Numididae        | 1.33   | 585000   | 1 | 0  | 0  | 0 | 0 | 1 | 0 |
| Colinus_virginianus       | Galloanserae                                | Odontophoridae   | 0.178  | 112000   | 1 | 0  | 0  | 0 | 0 | 1 | 0 |
| Callipepla_gambelii       | Galloanserae                                | Odontophoridae   | 0.166  | 104000   | 1 | 0  | 0  | 0 | 0 | 1 | 0 |
| Argusianus_argus          | Galloanserae                                | Phasianidae      | 1.99   | 134000   | 1 | 0  | 0  | 0 | 0 | 1 | 0 |
| Gallus_gallus             | Galloanserae                                | Phasianidae      | 0.78   | 158000   | 1 | 0  | 0  | 0 | 0 | 1 | 0 |
| Francolinus_francolinus   | Galloanserae                                | Phasianidae      | 0.453  | 140000   | 1 | 0  | 0  | 0 | 0 | 1 | 0 |
| Alectoris_graeca          | Galloanserae                                | Phasianidae      | 0.615  | 199000   | 1 | 0  | 0  | 0 | 0 | 1 | 0 |
| Coturnix_chinensis        | Galloanserae                                | Phasianidae      | 0.042  | 27600    | 1 | 0  | 0  | 0 | 0 | 1 | 0 |
| Coturnix_coturnix         | Galloanserae                                | Phasianidae      | 0.097  | 89800    | 1 | 1  | 1  | 1 | 0 | 1 | 0 |
| Ammoperdix_griseogularis  | Galloanserae                                | Phasianidae      | 0.203  | 87100    | 1 | 1  | 1  | 1 | 0 | 1 | 0 |
| Perdica_asiatca           | Galloanserae                                | Phasianidae      | 0.07   | 31800    | 1 | 0  | 0  | 0 | 0 | 1 | 0 |
| Centrocercus_urophasianus | Galloanserae                                | Tetraonidae      | 2.21   | 316000   | 1 | 1  | 1  | 1 | 0 | 0 | 0 |
| Tympanuchus_cupido        | Galloanserae                                | Tetraonidae      | 0.876  | 288000   | 1 | 1  | 1  | 1 | 0 | 0 | 0 |
| Lagopus_lagopus           | Galloanserae                                | Tetraonidae      | 0.571  | 208000   | 1 | 0  | 0  | 0 | 0 | 1 | 0 |
| Falciptennis_canadensis   | Galloanserae                                | Tetraonidae      | 0.474  | 208000   | 1 | 1  | 1  | 1 | 0 | 0 | 0 |
| Tetrao_urogallus          | Galloanserae                                | Tetraonidae      | 2.95   | 312000   | 1 | 1  | 1  | 1 | 1 | 0 | 0 |
| Perdix_perdix             | Galloanserae                                | Phasianidae      | 0.406  | 152000   | 1 | 0  | 0  | 0 | 0 | 1 | 0 |
| Meleagris_gallopavo       | Galloanserae                                | Meleagrididae    | 6.05   | 875000   | 1 | 1  | 0  | 0 | 1 | 0 | 0 |
| Lophophorus_impejanus     | Galloanserae                                | Phasianidae      | 2.08   | 371000   | 1 | 0  | 0  | 0 | 0 | 1 | 0 |
| Phasianus_colchicus       | Galloanserae                                | Phasianidae      | 1.14   | 3,00E+05 | 1 | 1  | 0  | 0 | 1 | 0 | 0 |
| Pucrasia_macrolopha       | Galloanserae                                | Phasianidae      | 1.06   | 218000   | 1 | 0  | 0  | 0 | 0 | 1 | 0 |
| Podiceps_cristatus        | Unnamed Clade                               | Podicipedidae    | 0.674  | 143000   | 1 | 0  | 0  | 0 | 0 | 1 | 0 |
| Phoenicopterus_ruber      | Unnamed Clade                               | Phoenicopteridae | 3.07   | 134000   | 2 | 0  | 0  | 0 | 0 | 1 | 0 |
| Columba_palumbus          | Unnamed Clade                               | Columbidae       | 0.49   | 34800    | 4 | 0  | 0  | 0 | 0 | 1 | 0 |
| Oena_capensis             | Unnamed Clade                               | Columbidae       | 0.0406 | 5480     | 4 | 0  | 0  | 0 | 0 | 1 | 0 |
| Monias_benschi            | Unnamed Clade                               | Mestiornithidae  | 0.138  | 22900    | 1 | 1  | 1  | 1 | 0 | 0 | 0 |
| Syrhaptes_paradoxus       | Unnamed Clade                               | Pteroclididae    | 0.257  | 56600    | 1 | 0  | 0  | 0 | 0 | 1 | 0 |
| Pterocles_alchata         | Unnamed Clade                               | Pteroclididae    | 0.285  | 55100    | 1 | 0  | 0  | 0 | 0 | 1 | 0 |
| Pterocles_indicus         | Unnamed Clade                               | Pteroclididae    | 0.179  | 29100    | 1 | 0  | 0  | 0 | 0 | 1 | 0 |
| Nyctibius_griseus         | Apodiforms, Caprimulgiforms and sister taxa | Nyctibidae       | 0.173  | 16300    | 3 | 0  | 0  | 0 | 0 | 1 | 0 |
| Steatornis_caripensis     | Apodiforms, Caprimulgiforms and sister taxa | Steatornithidae  | 0.408  | 59500    | 4 | 0  | 0  | 0 | 0 | 1 | 0 |
| Podargus_strigoides       | Apodiforms, Caprimulgiforms and sister taxa | Podargidae       | 0.31   | 51100    | 3 | 0  | 0  | 0 | 0 | 1 | 0 |
| Chordeiles_acutipennis    | Apodiforms, Caprimulgiforms and sister taxa | Caprimulgidae    | 0.0485 | 10800    | 2 | 0  | 0  | 0 | 0 | 1 | 0 |
| Selasphorus_rufus         | Apodiforms, Caprimulgiforms and sister taxa | Trochilidae      | 0.0035 | 921      | 4 | 1  | 0  | 0 | 1 | 0 | 0 |
| Hemiprocne_coronata       | Land Birds                                  | Hemiprocidae     | 0.029  | 3610     | 2 | 0  | 0  | 0 | 0 | 1 | 0 |
| Tachymarpitis_melba       | Apodiforms, Caprimulgiforms and sister taxa | Apodidae         | 0.103  | 12400    | 3 | 0  | 0  | 0 | 0 | 1 | 0 |

|                            |                                             |                  |        |        |   |   |   |   |   |   |   |
|----------------------------|---------------------------------------------|------------------|--------|--------|---|---|---|---|---|---|---|
| Caprimulgus_europaeus      | Apodiforms, Caprimulgiforms and sister taxa | Caprimulgidae    | 0.067  | 15600  | 2 | 0 | 0 | 0 | 0 | 1 | 0 |
| Macrodipteryx_vexillarius  | Apodiforms, Caprimulgiforms and sister taxa | Caprimulgidae    | 0.0724 | 9640   | 2 | 1 | 1 | 0 | 0 | 1 | 0 |
| Caprimulgus_indicus        | Apodiforms, Caprimulgiforms and sister taxa | Caprimulgidae    | 0.0918 | 14800  | 2 | 0 | 0 | 0 | 0 | 1 | 0 |
| Caprimulgus_macrurus       | Apodiforms, Caprimulgiforms and sister taxa | Caprimulgidae    | 0.0662 | 14400  | 2 | 0 | 0 | 0 | 0 | 1 | 0 |
| Crotophaga_ani             | Core Gruiforms and Cuckoos                  | Cuculidae        | 0.112  | 50000  | 3 | 0 | 0 | 0 | 0 | 1 | 0 |
| Coccyzus_americanus        | Core Gruiforms and Cuckoos                  | Cuculidae        | 0.064  | 36000  | 4 | 0 | 0 | 0 | 0 | 1 | 0 |
| Centropus_phasianinus      | Core Gruiforms and Cuckoos                  | Cuculidae        | 0.37   | 57740  | 4 | 0 | 0 | 0 | 0 | 1 | 0 |
| Centropus_sinensis         | Core Gruiforms and Cuckoos                  | Cuculidae        | 0.283  | 54000  | 3 | 0 | 0 | 0 | 0 | 1 | 0 |
| Centropus_grillii          | Core Gruiforms and Cuckoos                  | Cuculidae        | 0.1    | 31415  | 4 | 0 | 1 | 1 | 0 | 0 | 0 |
| Corythaeola_cristata       | Water Birds and Musophagiforms              | Musophagidae     | 0.965  | 67700  | 3 | 0 | 0 | 0 | 0 | 1 | 0 |
| Eupodotis_ruficrista       | Core Gruiforms and Cuckoos                  | Otididae         | 0.714  | 83200  | 1 | 1 | 1 | 0 | 1 | 0 | 0 |
| Neotitis_denhami           | Core Gruiforms and Cuckoos                  | Otididae         | 4.83   | 225000 | 1 | 1 | 1 | 1 | 1 | 0 | 0 |
| Tetrax_tetrax              | Core Gruiforms and Cuckoos                  | Otididae         | 0.834  | 152000 | 1 | 1 | 1 | 0 | 1 | 0 | 0 |
| Houbaropsis_bengalensis    | Core Gruiforms and Cuckoos                  | Otididae         | 2.03   | 130000 | 1 | 1 | 1 | 1 | 1 | 0 | 0 |
| Otis_tarda                 | Core Gruiforms and Cuckoos                  | Otididae         | 7.896  | 337264 | 1 | 0 | 0 | 0 | 1 | 0 | 0 |
| Chlamydotis_undulata       | Core Gruiforms and Cuckoos                  | Otididae         | 1.56   | 195000 | 1 | 1 | 1 | 0 | 1 | 0 | 0 |
| Aramus_guarauna            | Core Gruiforms and Cuckoos                  | Aramidae         | 1.08   | 352000 | 1 | 0 | 1 | 0 | 1 | 0 | 0 |
| Balearica_pavonina         | Core Gruiforms and Cuckoos                  | Gruidae          | 3.59   | 322000 | 3 | 0 | 0 | 0 | 0 | 1 | 0 |
| Grus_antigone              | Core Gruiforms and Cuckoos                  | Gruidae          | 5.96   | 396000 | 3 | 0 | 0 | 0 | 0 | 1 | 0 |
| Grus_grus                  | Core Gruiforms and Cuckoos                  | Gruidae          | 5.5    | 382000 | 3 | 0 | 0 | 0 | 0 | 1 | 0 |
| Gallirallus_striatus       | Core Gruiforms and Cuckoos                  | Rallidae         | 0.116  | 83300  | 2 | 0 | 0 | 0 | 0 | 1 | 0 |
| Fulica_atra                | Core Gruiforms and Cuckoos                  | Rallidae         | 0.734  | 260000 | 2 | 0 | 0 | 0 | 0 | 1 | 0 |
| Gallinula_chloropus        | Core Gruiforms and Cuckoos                  | Rallidae         | 0.344  | 167000 | 2 | 0 | 1 | 0 | 0 | 1 | 0 |
| Porphyrio_porphyrio        | Core Gruiforms and Cuckoos                  | Rallidae         | 0.794  | 161000 | 2 | 1 | 1 | 0 | 0 | 1 | 0 |
| Crex_crex                  | Core Gruiforms and Cuckoos                  | Rallidae         | 0.156  | 133000 | 1 | 0 | 0 | 0 | 1 | 0 | 0 |
| Porzana_carolina           | Core Gruiforms and Cuckoos                  | Rallidae         | 0.0748 | 76500  | 2 | 0 | 0 | 0 | 0 | 1 | 0 |
| Aenigmatolimnas_marginalis | Core Gruiforms and Cuckoos                  | Rallidae         | 0.05   | 30990  | 1 | 0 | 1 | 1 | 0 | 0 | 0 |
| Porzana_fusca              | Core Gruiforms and Cuckoos                  | Rallidae         | 0.0576 | 62700  | 2 | 0 | 0 | 0 | 0 | 1 | 0 |
| Porzana_parva              | Core Gruiforms and Cuckoos                  | Rallidae         | 0.0497 | 50600  | 1 | 0 | 0 | 0 | 0 | 1 | 0 |
| Burhinus_oedicnemus        | Charadriiforms                              | Burhinidae       | 0.459  | 93200  | 4 | 0 | 0 | 0 | 0 | 1 | 0 |
| Chionis_alba               | Charadriiforms                              | Chionidae        | 0.677  | 98600  | 2 | 0 | 0 | 0 | 0 | 1 | 0 |
| Pluvianus_aegyptius        | Charadriiforms                              | Glareolidae      | 0.082  | 22200  | 1 | 0 | 0 | 0 | 0 | 1 | 0 |
| Vanellus_vanellus          | Charadriiforms                              | Charadriidae     | 0.219  | 102000 | 1 | 1 | 1 | 0 | 0 | 1 | 0 |
| Charadrius_morinellus      | Charadriiforms                              | Charadriidae     | 0.12   | 58900  | 1 | 1 | 1 | 0 | 0 | 0 | 0 |
| Charadrius_alexandrinus    | Charadriiforms                              | Charadriidae     | 0.0423 | 27600  | 1 | 0 | 0 | 0 | 0 | 1 | 0 |
| Charadrius_hiaticula       | Charadriiforms                              | Charadriidae     | 0.0641 | 45800  | 1 | 0 | 0 | 0 | 0 | 1 | 0 |
| Pluvialis_apricaria        | Charadriiforms                              | Charadriidae     | 0.214  | 116000 | 1 | 0 | 0 | 0 | 0 | 1 | 0 |
| Haematopus_ostralegus      | Charadriiforms                              | Haematopodidae   | 0.526  | 161000 | 1 | 1 | 1 | 0 | 0 | 1 | 0 |
| Ibidorhyncha_struthersii   | Charadriiforms                              | Ibidorhynchidae  | 0.294  | 135000 | 1 | 0 | 0 | 0 | 0 | 1 | 0 |
| Himantopus_himantopus      | Charadriiforms                              | Recurvirostridae | 0.161  | 85300  | 1 | 0 | 0 | 0 | 0 | 1 | 0 |
| Recurvirostra_avosetta     | Charadriiforms                              | Recurvirostridae | 0.304  | 119000 | 1 | 0 | 0 | 0 | 0 | 1 | 0 |
| Pedionomus_torquatus       | Charadriiforms                              | Pedinomidae      | 0.0632 | 41800  | 1 | 0 | 1 | 0 | 0 | 1 | 0 |
| Attagis_gayi               | Charadriiforms                              | Thinocoridae     | 0.311  | 105000 | 1 | 0 | 0 | 0 | 0 | 1 | 0 |
| Thinocorus_orbignyianus    | Charadriiforms                              | Thinocoridae     | 0.115  | 52000  | 1 | 0 | 0 | 0 | 0 | 1 | 0 |
| Rostratula_benghalensis    | Charadriiforms                              | Rostratulidae    | 0.121  | 41200  | 1 | 0 | 1 | 1 | 0 | 0 | 0 |
| Actophilornis_africana     | Charadriiforms                              | Jacaniidae       | 0.185  | 31642  | 1 | 1 | 1 | 0 | 0 | 0 | 0 |
| Hydrophasianus_chirurgus   | Charadriiforms                              | Jacaniidae       | 0.164  | 57900  | 1 | 0 | 1 | 1 | 0 | 0 | 0 |
| Metopidius_indicus         | Charadriiforms                              | Jacaniidae       | 0.155  | 44700  | 1 | 0 | 1 | 0 | 0 | 0 | 0 |
| Jacana_jacana              | Charadriiforms                              | Jacaniidae       | 0.15   | 38000  | 1 | 0 | 1 | 1 | 0 | 0 | 0 |
| Jacana_spinosa             | Charadriiforms                              | Jacaniidae       | 0.126  | 32103  | 1 | 0 | 1 | 1 | 0 | 0 | 0 |
| Bartramia_longicauda       | Charadriiforms                              | Scolopacidae     | 0.159  | 104000 | 1 | 0 | 0 | 0 | 0 | 1 | 0 |
| Numenius_arquata           | Charadriiforms                              | Scolopacidae     | 0.806  | 366000 | 1 | 0 | 0 | 0 | 0 | 1 | 0 |
| Limosa_limosa              | Charadriiforms                              | Scolopacidae     | 0.291  | 197000 | 1 | 0 | 0 | 0 | 0 | 1 | 0 |
| Scolopax_minor             | Charadriiforms                              | Scolopacidae     | 0.198  | 63000  | 1 | 1 | 0 | 0 | 0 | 1 | 0 |
| Scolopax_rusticola         | Charadriiforms                              | Scolopacidae     | 0.31   | 115000 | 1 | 1 | 0 | 0 | 1 | 0 | 0 |
| Coenocorypha_aucklandica   | Charadriiforms                              | Scolopacidae     | 0.109  | 37600  | 1 | 1 | 0 | 0 | 0 | 1 | 0 |
| Gallinago_media            | Charadriiforms                              | Scolopacidae     | 0.171  | 76300  | 1 | 1 | 0 | 0 | 1 | 0 | 0 |
| Arenaria_interpres         | Charadriiforms                              | Scolopacidae     | 0.136  | 69500  | 1 | 0 | 0 | 0 | 0 | 1 | 0 |
| Philomachus_pugnax         | Charadriiforms                              | Scolopacidae     | 0.136  | 69900  | 1 | 1 | 0 | 0 | 1 | 0 | 0 |
| Calidris_bairdii           | Charadriiforms                              | Scolopacidae     | 0.0411 | 31600  | 1 | 0 | 0 | 0 | 0 | 1 | 0 |
| Phalaropus_tricolor        | Charadriiforms                              | Scolopacidae     | 0.06   | 32500  | 1 | 0 | 0 | 0 | 0 | 0 | 0 |
| Phalaropus_fulicarius      | Charadriiforms                              | Scolopacidae     | 0.056  | 30100  | 1 | 0 | 1 | 0 | 0 | 0 | 0 |
| Phalaropus_lobatus         | Charadriiforms                              | Scolopacidae     | 0.04   | 29000  | 1 | 0 | 1 | 0 | 0 | 0 | 0 |
| Tringa_totanus             | Charadriiforms                              | Scolopacidae     | 0.129  | 85400  | 1 | 0 | 0 | 0 | 0 | 1 | 0 |
| Actitis_hypoleucos         | Charadriiforms                              | Scolopacidae     | 0.048  | 47800  | 1 | 0 | 0 | 0 | 0 | 1 | 0 |
| Actitis_macularius         | Charadriiforms                              | Scolopacidae     | 0.0404 | 37600  | 1 | 0 | 1 | 1 | 0 | 0 | 0 |
| Turnix_sylvatica           | Charadriiforms                              | Turnicidae       | 0.054  | 18000  | 1 | 0 | 1 | 0 | 0 | 0 | 0 |
| Turnix_varia               | Charadriiforms                              | Turnicidae       | 0.0925 | 26415  | 1 | 0 | 1 | 1 | 0 | 0 | 0 |
| Rhinoptilus_africanus      | Charadriiforms                              | Glareolidae      | 0.0875 | 8810   | 1 | 0 | 0 | 0 | 0 | 1 | 0 |
| Glareola_pratincola        | Charadriiforms                              | Glareolidae      | 0.0849 | 27800  | 1 | 0 | 0 | 0 | 0 | 1 | 0 |
| Cursorius_cursor           | Charadriiforms                              | Glareolidae      | 0.138  | 21900  | 1 | 0 | 0 | 0 | 0 | 1 | 0 |
| Stercorarius_longicaudus   | Charadriiforms                              | Stercorariidae   | 0.289  | 84700  | 1 | 0 | 0 | 0 | 0 | 1 | 0 |
| Catharacta_skuua           | Charadriiforms                              | Stercorariidae   | 1.34   | 168000 | 1 | 0 | 0 | 0 | 0 | 1 | 0 |
| Fratercula_arctica         | Charadriiforms                              | Alcidae          | 0.652  | 56200  | 2 | 0 | 0 | 0 | 0 | 1 | 0 |

|                           |                                             |                   |        |        |   |   |   |   |   |   |   |
|---------------------------|---------------------------------------------|-------------------|--------|--------|---|---|---|---|---|---|---|
| Cerorhinca_monocerata     | Charadriiforms                              | Alcidae           | 0.483  | 75500  | 2 | 0 | 0 | 0 | 0 | 1 | 0 |
| Cephus_grylle             | Charadriiforms                              | Alcidae           | 0.378  | 92300  | 2 | 0 | 0 | 0 | 0 | 1 | 0 |
| Synthliboramphus_antiquus | Charadriiforms                              | Alcidae           | 0.207  | 70400  | 1 | 0 | 0 | 0 | 0 | 1 | 0 |
| Uria_aalge                | Charadriiforms                              | Alcidae           | 0.992  | 101000 | 2 | 0 | 0 | 0 | 0 | 1 | 0 |
| Alle_alle                 | Charadriiforms                              | Alcidae           | 0.181  | 26900  | 2 | 0 | 0 | 0 | 0 | 1 | 0 |
| Alca_torda                | Charadriiforms                              | Alcidae           | 0.726  | 82200  | 2 | 0 | 0 | 0 | 0 | 1 | 0 |
| Anous_stolidus            | Charadriiforms                              | Sternidae         | 0.178  | 33700  | 1 | 0 | 0 | 0 | 0 | 1 | 0 |
| Gygis_alba                | Charadriiforms                              | Sternidae         | 0.111  | 20700  | 1 | 0 | 0 | 0 | 0 | 1 | 0 |
| Gelochelidon_nilotica     | Charadriiforms                              | Sternidae         | 0.221  | 115000 | 1 | 0 | 0 | 0 | 0 | 1 | 0 |
| Chlidonias_niger          | Charadriiforms                              | Sternidae         | 0.0653 | 32100  | 1 | 0 | 0 | 0 | 0 | 1 | 0 |
| Chlidonias_hybridus       | Charadriiforms                              | Sternidae         | 0.0839 | 46800  | 1 | 0 | 0 | 0 | 0 | 1 | 0 |
| Sterna_hirundo            | Charadriiforms                              | Sternidae         | 0.13   | 53400  | 1 | 0 | 0 | 0 | 0 | 1 | 0 |
| Thalasseus_bengalensis    | Charadriiforms                              | Sternidae         | 0.209  | 35700  | 1 | 0 | 0 | 0 | 0 | 1 | 0 |
| Rynchops_niger            | Charadriiforms                              | Rynchopidae       | 0.302  | 125000 | 1 | 0 | 0 | 0 | 0 | 1 | 0 |
| Rissa_tridactyla          | Charadriiforms                              | Laridae           | 0.408  | 95400  | 1 | 0 | 0 | 0 | 0 | 1 | 0 |
| Larus_ridibundus          | Charadriiforms                              | Laridae           | 0.284  | 149000 | 1 | 0 | 0 | 0 | 0 | 1 | 0 |
| Rhodostethia_rosea        | Charadriiforms                              | Laridae           | 0.187  | 55000  | 1 | 0 | 0 | 0 | 0 | 1 | 0 |
| Larus_minutus             | Charadriiforms                              | Laridae           | 0.118  | 81900  | 1 | 0 | 0 | 0 | 0 | 1 | 0 |
| Larus_marinus             | Charadriiforms                              | Laridae           | 1.66   | 386000 | 1 | 0 | 0 | 0 | 0 | 1 | 0 |
| Larus_hyperboreus         | Charadriiforms                              | Laridae           | 1.54   | 357000 | 1 | 0 | 0 | 0 | 0 | 1 | 0 |
| Larus_argentatus          | Charadriiforms                              | Laridae           | 1.09   | 259000 | 1 | 0 | 0 | 0 | 0 | 1 | 0 |
| Phaethon_aethereus        | Unnamed Clade                               | Phaethontidae     | 0.75   | 51700  | 2 | 0 | 0 | 0 | 0 | 1 | 0 |
| Rhynochetos_jubata        | Apodiforms, Caprimulgiforms and sister taxa | Rhynchotidae      | 0.86   | 64900  | 2 | 0 | 0 | 0 | 0 | 1 | 0 |
| Gavia_immer               | Water Birds and Musophagiforms              | Gaviidae          | 4.98   | 317000 | 1 | 0 | 0 | 0 | 0 | 1 | 0 |
| Aptenodytes_forsteri      | Water Birds and Musophagiforms              | Spheniscidae      | 32.55  | 400945 | 3 | 0 | 0 | 0 | 0 | 1 | 0 |
| Aptenodytes_patagonica    | Water Birds and Musophagiforms              | Spheniscidae      | 11.8   | 286000 | 2 | 0 | 0 | 0 | 0 | 1 | 0 |
| Hydrobates_pelagicus      | Water Birds and Musophagiforms              | Hydrobatidae      | 0.0252 | 5890   | 3 | 0 | 0 | 0 | 0 | 1 | 0 |
| Diomedea_exulans          | Water Birds and Musophagiforms              | Diomedidae        | 7.05   | 447000 | 3 | 0 | 0 | 0 | 0 | 1 | 0 |
| Diomedea_epomorpha        | Water Birds and Musophagiforms              | Diomedidae        | 9      | 419811 | 2 | 0 | 0 | 0 | 0 | 1 | 0 |
| Fulmarus_glaucialis       | Water Birds and Musophagiforms              | Procellariidae    | 0.613  | 88800  | 3 | 0 | 0 | 0 | 0 | 1 | 0 |
| Pelecanoides_urinatrix    | Water Birds and Musophagiforms              | Pelecanoididae    | 0.141  | 19100  | 3 | 0 | 0 | 0 | 0 | 1 | 0 |
| Bulweria_bulwerii         | Water Birds and Musophagiforms              | Procellariidae    | 0.099  | 20200  | 3 | 0 | 0 | 0 | 0 | 1 | 0 |
| Ciconia_ciconia           | Water Birds and Musophagiforms              | Ciconiidae        | 3.45   | 387000 | 2 | 0 | 0 | 0 | 0 | 1 | 0 |
| Fregata_magnificens       | Water Birds and Musophagiforms              | Fregatidae        | 1.41   | 117000 | 2 | 0 | 0 | 0 | 0 | 1 | 0 |
| Phalacrocorax_carbo       | Water Birds and Musophagiforms              | Phalacrocoracidae | 2.57   | 181000 | 4 | 0 | 0 | 0 | 0 | 1 | 0 |
| Sula_bassana              | Water Birds and Musophagiforms              | Sulidae           | 3      | 85700  | 2 | 0 | 0 | 0 | 0 | 1 | 0 |
| Anhinga_anhinga           | Water Birds and Musophagiforms              | Anhingiidae       | 1.24   | 153000 | 2 | 0 | 0 | 0 | 0 | 1 | 0 |
| Eudocimus_ruber           | Water Birds and Musophagiforms              | Threskiornithidae | 0.665  | 125000 | 3 | 0 | 0 | 0 | 0 | 1 | 0 |
| Greeneria_eremita         | Water Birds and Musophagiforms              | Threskiornithidae | 1.2    | 159000 | 3 | 0 | 0 | 0 | 0 | 1 | 0 |
| Plegadis_falcinellus      | Water Birds and Musophagiforms              | Threskiornithidae | 0.634  | 120000 | 3 | 0 | 0 | 0 | 0 | 1 | 0 |
| Bostrychia_hagedash       | Water Birds and Musophagiforms              | Threskiornithidae | 1.24   | 135000 | 3 | 0 | 0 | 0 | 0 | 1 | 0 |
| Threskiornis_aethiopicus  | Water Birds and Musophagiforms              | Threskiornithidae | 1.5    | 144000 | 3 | 0 | 0 | 0 | 0 | 1 | 0 |
| Platalea_ajaja            | Water Birds and Musophagiforms              | Threskiornithidae | 1.49   | 220000 | 3 | 0 | 0 | 0 | 0 | 1 | 0 |
| Pelecanus_onocrotalus     | Water Birds and Musophagiforms              | Pelecanidae       | 9.52   | 316000 | 4 | 0 | 0 | 0 | 0 | 1 | 0 |
| Scopus_umbretta           | Water Birds and Musophagiforms              | Scopidae          | 0.472  | 111000 | 2 | 0 | 0 | 0 | 0 | 1 | 0 |
| Balaeniceps_rex           | Water Birds and Musophagiforms              | Balaenicipitidae  | 5.98   | 297000 | 1 | 0 | 0 | 0 | 0 | 1 | 0 |
| Botaurus_stellaris        | Water Birds and Musophagiforms              | Ardeidae          | 1.33   | 183000 | 4 | 0 | 0 | 0 | 0 | 1 | 0 |
| Ixobrychus_minutus        | Water Birds and Musophagiforms              | Ardeidae          | 0.101  | 85700  | 4 | 0 | 0 | 0 | 0 | 1 | 0 |
| Ardeola_ralloides         | Water Birds and Musophagiforms              | Ardeidae          | 0.287  | 49500  | 4 | 0 | 0 | 0 | 0 | 1 | 0 |
| Ardea_herodias            | Water Birds and Musophagiforms              | Ardeidae          | 2.3    | 272000 | 4 | 0 | 0 | 0 | 0 | 1 | 0 |
| Bubulcus_ibis             | Water Birds and Musophagiforms              | Ardeidae          | 0.366  | 77500  | 4 | 0 | 0 | 0 | 0 | 1 | 0 |
| Tyto_alba                 | Land Birds                                  | Tytonidae         | 0.418  | 114000 | 3 | 0 | 0 | 0 | 0 | 1 | 0 |
| Bubo_bubo                 | Land Birds                                  | Strigidae         | 2.69   | 287000 | 3 | 0 | 0 | 0 | 0 | 1 | 0 |
| Colius_striatus           | Land Birds                                  | Coliidae          | 0.0511 | 8750   | 4 | 0 | 0 | 0 | 0 | 1 | 0 |
| Trogon_citreolus          | Land Birds                                  | Trogonidae        | 0.079  | 23100  | 4 | 0 | 0 | 0 | 0 | 1 | 0 |
| Pharomachrus_mocinno      | Land Birds                                  | Trogonidae        | 0.203  | 25100  | 4 | 0 | 0 | 0 | 0 | 1 | 0 |
| Aceros_nipalensis         | Land Birds                                  | Bucerotidae       | 2.39   | 84300  | 4 | 0 | 0 | 0 | 0 | 1 | 0 |
| Phoeniculus_purpureus     | Land Birds                                  | Phoeniculidae     | 0.0743 | 13400  | 4 | 0 | 0 | 0 | 0 | 1 | 0 |
| Upupa_epops               | Land Birds                                  | Upupidae          | 0.0671 | 26900  | 4 | 0 | 0 | 0 | 0 | 1 | 0 |
| Dryocopus_martius         | Land Birds                                  | Picidae           | 0.321  | 51300  | 4 | 0 | 0 | 0 | 0 | 1 | 0 |
| Galbula_ruficauda         | Land Birds                                  | Galbulidae        | 0.0265 | 9840   | 4 | 0 | 0 | 0 | 0 | 1 | 0 |
| Chelidoptera_tenebrosa    | Land Birds                                  | Bucconidae        | 0.0359 | 7340   | 4 | 0 | 0 | 0 | 0 | 1 | 0 |
| Merops_philippinus        | Land Birds                                  | Meropidae         | 0.034  | 27300  | 4 | 0 | 0 | 0 | 0 | 1 | 0 |
| Coracias_benghalensis     | Land Birds                                  | Coraciidae        | 0.158  | 48300  | 4 | 0 | 0 | 0 | 0 | 1 | 0 |
| Todus_todus               | Land Birds                                  | Todidae           | 0.0064 | 5040   | 4 | 0 | 0 | 0 | 0 | 1 | 0 |
| Alcedo_atthis             | Land Birds                                  | Alcedinidae       | 0.0314 | 20100  | 4 | 0 | 0 | 0 | 0 | 1 | 0 |
| Momotus_mexicanus         | Land Birds                                  | Momotidae         | 0.0757 | 25000  | 4 | 0 | 0 | 0 | 0 | 1 | 0 |
| Cathartes_aura            | Land Birds                                  | Cathartidae       | 1.72   | 160000 | 3 | 0 | 0 | 0 | 0 | 1 | 0 |
| Vultur_gryphus            | Land Birds                                  | Cathartidae       | 11.3   | 278000 | 3 | 0 | 0 | 0 | 0 | 1 | 0 |
| Sarcorhamphus_papa        | Land Birds                                  | Cathartidae       | 3.4    | 187000 | 3 | 0 | 0 | 0 | 0 | 1 | 0 |
| Coragyps_atratus          | Land Birds                                  | Cathartidae       | 1.9    | 191000 | 3 | 0 | 0 | 0 | 0 | 1 | 0 |
| Gymnogyps_californicus    | Land Birds                                  | Cathartidae       | 8.45   | 258746 | 2 | 0 | 0 | 0 | 0 | 1 | 0 |
| Sagittarius_serpentarius  | Land Birds                                  | Sagittariidae     | 4.02   | 335000 | 3 | 0 | 0 | 0 | 0 | 1 | 0 |
| Pandion_haliaetus         | Land Birds                                  | Pandionidae       | 1.49   | 193000 | 3 | 1 | 0 | 0 | 0 | 1 | 0 |

|                              |            |                   |        |        |   |   |   |   |   |   |   |
|------------------------------|------------|-------------------|--------|--------|---|---|---|---|---|---|---|
| Elanus caeruleus             | Land Birds | Accipitridae      | 0.261  | 74000  | 3 | 0 | 1 | 0 | 0 | 1 | 0 |
| Pernis apivorus              | Land Birds | Accipitridae      | 0.758  | 89200  | 3 | 0 | 0 | 0 | 0 | 1 | 0 |
| Polyboroides typus           | Land Birds | Accipitridae      | 0.638  | 103000 | 3 | 0 | 0 | 0 | 0 | 1 | 0 |
| Neophron percnopterus        | Land Birds | Accipitridae      | 2.08   | 160000 | 3 | 0 | 0 | 0 | 0 | 1 | 0 |
| Gypaetus barbatus            | Land Birds | Accipitridae      | 5.7    | 254000 | 3 | 0 | 0 | 0 | 0 | 1 | 0 |
| Circus gallicus              | Land Birds | Accipitridae      | 1.7    | 126000 | 3 | 0 | 0 | 0 | 0 | 1 | 0 |
| Spilornis cheela             | Land Birds | Accipitridae      | 0.628  | 94900  | 3 | 0 | 0 | 0 | 0 | 1 | 0 |
| Gyps fulvus                  | Land Birds | Accipitridae      | 7.44   | 232000 | 3 | 0 | 0 | 0 | 0 | 1 | 0 |
| Torgos tracheliotus          | Land Birds | Accipitridae      | 6.97   | 227000 | 3 | 0 | 0 | 0 | 0 | 1 | 0 |
| Aegyptius monachus           | Land Birds | Accipitridae      | 9.63   | 211000 | 3 | 0 | 0 | 0 | 0 | 1 | 0 |
| Aquila chrysaetos            | Land Birds | Accipitridae      | 4.26   | 271000 | 3 | 0 | 0 | 0 | 0 | 1 | 0 |
| Haliaeetus leucocephalus     | Land Birds | Accipitridae      | 4.74   | 219000 | 3 | 0 | 0 | 0 | 0 | 1 | 0 |
| Haliaeetus leucorhynchus     | Land Birds | Accipitridae      | 0.529  | 109000 | 3 | 0 | 0 | 0 | 0 | 1 | 0 |
| Milvus milvus                | Land Birds | Accipitridae      | 1.08   | 171000 | 3 | 0 | 0 | 0 | 0 | 1 | 0 |
| Buteo lagopus                | Land Birds | Accipitridae      | 0.956  | 197000 | 3 | 0 | 0 | 0 | 0 | 1 | 0 |
| Circus pygargus              | Land Birds | Accipitridae      | 0.316  | 139000 | 3 | 1 | 0 | 0 | 0 | 1 | 0 |
| Accipiter gentilis           | Land Birds | Accipitridae      | 0.902  | 180000 | 3 | 0 | 0 | 0 | 0 | 1 | 0 |
| Accipiter nisus              | Land Birds | Accipitridae      | 0.238  | 92200  | 3 | 0 | 0 | 0 | 0 | 1 | 0 |
| Cariacus cristata            | Land Birds | Cariacidae        | 1.4    | 143000 | 4 | 0 | 0 | 0 | 0 | 1 | 0 |
| Polyborus cheriway           | Land Birds | Falconidae        | 0.894  | 187000 | 3 | 0 | 0 | 0 | 0 | 1 | 0 |
| Pollhierax semitorquatus     | Land Birds | Falconidae        | 0.0615 | 18700  | 3 | 0 | 1 | 0 | 0 | 1 | 0 |
| Falco rusticolus             | Land Birds | Falconidae        | 1.46   | 272000 | 3 | 0 | 0 | 0 | 0 | 1 | 0 |
| Falco naumanni               | Land Birds | Falconidae        | 0.153  | 64300  | 3 | 0 | 0 | 0 | 0 | 1 | 0 |
| Falco peregrinus             | Land Birds | Falconidae        | 0.783  | 127000 | 3 | 0 | 0 | 0 | 0 | 1 | 0 |
| Falco vespertinus            | Land Birds | Falconidae        | 0.153  | 57500  | 3 | 0 | 0 | 0 | 0 | 1 | 0 |
| Psittacula krameri           | Land Birds | Psittacidae       | 0.117  | 36400  | 4 | 0 | 0 | 0 | 0 | 1 | 0 |
| Pitta nipalensis             | Land Birds | Pittidae          | 0.124  | 31300  | 4 | 0 | 0 | 0 | 0 | 1 | 0 |
| Serilophus lunatus           | Land Birds | Eurylaimidae      | 0.034  | 17700  | 4 | 0 | 0 | 0 | 0 | 1 | 0 |
| Psarisomus dalhousiae        | Land Birds | Eurylaimidae      | 0.067  | 25900  | 4 | 0 | 0 | 0 | 0 | 1 | 0 |
| Taraba major                 | Land Birds | Thamnophilidae    | 0.0592 | 16000  | 4 | 0 | 0 | 0 | 0 | 1 | 0 |
| Drymornis bridgesii          | Land Birds | Dendrocolaptidae  | 0.094  | 21100  | 4 | 0 | 0 | 0 | 0 | 1 | 0 |
| Hypolepezus perspicillatus   | Land Birds | Formicariidae     | 0.043  | 11100  | 4 | 0 | 0 | 0 | 0 | 1 | 0 |
| Scytalopus magellanicus      | Land Birds | Rhinocryptidae    | 0.0136 | 6850   | 4 | 0 | 0 | 0 | 0 | 1 | 0 |
| Manacus manacus              | Land Birds | Pipridae          | 0.0192 | 5020   | 4 | 0 | 0 | 1 | 0 | 1 | 0 |
| Rupicola rupicola            | Land Birds | Cotingidae        | 0.195  | 43000  | 4 | 0 | 0 | 1 | 0 | 0 | 0 |
| Phytotoma rara               | Land Birds | Cotingidae        | 0.047  | 12400  | 4 | 0 | 0 | 0 | 0 | 1 | 0 |
| Elaenia flavogaster          | Land Birds | Tyrannidae        | 0.0248 | 4700   | 4 | 0 | 0 | 0 | 0 | 1 | 0 |
| Myiarchus crinitus           | Land Birds | Tyrannidae        | 0.0321 | 16000  | 4 | 0 | 0 | 0 | 0 | 1 | 0 |
| Tyrannus melancholicus       | Land Birds | Tyrannidae        | 0.0374 | 16500  | 4 | 0 | 0 | 0 | 0 | 1 | 0 |
| Menura novaehollandiae       | Land Birds | Menuridae         | 0.98   | 58500  | 4 | 1 | 1 | 0 | 0 | 1 | 0 |
| Sericulus chrysocephalus     | Land Birds | Ptilonorhynchidae | 0.1    | 23900  | 4 | 1 | 0 | 0 | 0 | 1 | 0 |
| Malurus cyaneus              | Land Birds | Maluridae         | 0.0101 | 4740   | 4 | 0 | 1 | 0 | 0 | 1 | 0 |
| Anthornis melanura           | Land Birds | Meliphagidae      | 0.0272 | 12100  | 4 | 0 | 0 | 0 | 0 | 1 | 0 |
| Prothemadera novaeseelandiae | Land Birds | Meliphagidae      | 0.107  | 25600  | 4 | 0 | 0 | 0 | 0 | 1 | 0 |
| Creadion carunculatus        | Land Birds | Callaeatidae      | 0.075  | 17700  | 4 | 0 | 0 | 0 | 0 | 1 | 0 |
| Pachycephala pectoralis      | Land Birds | Pachycephalidae   | 0.0303 | 7180   | 4 | 0 | 0 | 0 | 0 | 1 | 0 |
| Vanga curvirostris           | Land Birds | Vangidae          | 0.0645 | 13100  | 4 | 0 | 0 | 0 | 0 | 1 | 0 |
| Tchagra senegala             | Land Birds | Malacoctidae      | 0.0535 | 11000  | 4 | 0 | 0 | 0 | 0 | 1 | 0 |
| Laniarius ferrugineus        | Land Birds | Malacoctidae      | 0.0468 | 9370   | 4 | 0 | 0 | 0 | 0 | 1 | 0 |
| Rhipidura albicollis         | Land Birds | Rhipiduridae      | 0.0129 | 3640   | 4 | 0 | 0 | 0 | 0 | 1 | 0 |
| Hypothymis azurea            | Land Birds | Monarchidae       | 0.0111 | 5280   | 4 | 0 | 0 | 0 | 0 | 1 | 0 |
| Terpsiphone paradisi         | Land Birds | Monarchidae       | 0.0185 | 7690   | 4 | 0 | 0 | 0 | 0 | 1 | 0 |
| Dicrurus aeneas              | Land Birds | Dicruridae        | 0.0265 | 12300  | 4 | 0 | 0 | 0 | 0 | 1 | 0 |
| Dicrurus hottentottus        | Land Birds | Dicruridae        | 0.0792 | 22100  | 4 | 0 | 0 | 0 | 0 | 1 | 0 |
| Dicrurus macrocercus         | Land Birds | Dicruridae        | 0.0483 | 15600  | 4 | 0 | 0 | 0 | 0 | 1 | 0 |
| Dicrurus adsimilis           | Land Birds | Dicruridae        | 0.0403 | 9160   | 4 | 0 | 0 | 0 | 0 | 1 | 0 |
| Manucodia keraudrenii        | Land Birds | Paradisaeidae     | 0.156  | 22000  | 4 | 0 | 0 | 0 | 0 | 1 | 0 |
| Paradisaea minor             | Land Birds | Paradisaeidae     | 0.214  | 19300  | 4 | 1 | 0 | 0 | 1 | 0 | 0 |
| Seleucides melanoleuca       | Land Birds | Paradisaeidae     | 0.175  | 14100  | 4 | 1 | 0 | 0 | 1 | 0 | 0 |
| Ptiloris paradiseus          | Land Birds | Paradisaeidae     | 0.121  | 18900  | 4 | 1 | 0 | 0 | 1 | 0 | 0 |
| Lophorina superba            | Land Birds | Paradisaeidae     | 0.077  | 7070   | 4 | 1 | 0 | 0 | 1 | 0 | 0 |
| Lanius collurio              | Land Birds | Laniidae          | 0.0285 | 15800  | 4 | 0 | 0 | 0 | 0 | 1 | 0 |
| Lanius senator               | Land Birds | Laniidae          | 0.036  | 19500  | 4 | 0 | 0 | 0 | 0 | 1 | 0 |
| Pyrrhocorax pyrrhocorax      | Land Birds | Corvidae          | 0.278  | 55900  | 4 | 0 | 0 | 0 | 0 | 1 | 0 |
| Perisoreus infaustus         | Land Birds | Corvidae          | 0.0844 | 32500  | 4 | 0 | 0 | 0 | 0 | 1 | 0 |
| Cyanopica cyana              | Land Birds | Corvidae          | 0.096  | 38600  | 4 | 0 | 0 | 0 | 0 | 1 | 0 |
| Cyanocorax melanocyaneus     | Land Birds | Corvidae          | 0.101  | 22400  | 4 | 0 | 0 | 0 | 0 | 1 | 0 |
| Cyanocorax sanblasiana       | Land Birds | Corvidae          | 0.109  | 26900  | 4 | 0 | 0 | 0 | 0 | 1 | 0 |
| Aphelocoma californica       | Land Birds | Corvidae          | 0.0862 | 20900  | 4 | 0 | 0 | 0 | 0 | 1 | 0 |
| Cyanocitta cristata          | Land Birds | Corvidae          | 0.088  | 22400  | 4 | 0 | 0 | 0 | 0 | 1 | 0 |
| Garrulus glandarius          | Land Birds | Corvidae          | 0.168  | 45700  | 4 | 0 | 0 | 0 | 0 | 1 | 0 |
| Podoces panderi              | Land Birds | Corvidae          | 0.0911 | 21300  | 4 | 0 | 0 | 0 | 0 | 1 | 0 |
| Pica pica                    | Land Birds | Corvidae          | 0.218  | 64300  | 4 | 0 | 0 | 0 | 0 | 1 | 0 |
| Nucifraga caryocatactes      | Land Birds | Corvidae          | 0.183  | 28300  | 4 | 0 | 0 | 0 | 0 | 1 | 0 |

|                                 |            |                 |        |        |   |   |   |   |   |   |   |
|---------------------------------|------------|-----------------|--------|--------|---|---|---|---|---|---|---|
| Corvus_monedula                 | Land Birds | Corvidae        | 0.246  | 49500  | 4 | 0 | 0 | 0 | 0 | 1 | 0 |
| Corvus_capensis                 | Land Birds | Corvidae        | 0.553  | 73100  | 4 | 0 | 0 | 0 | 0 | 1 | 0 |
| Corvus_corax                    | Land Birds | Corvidae        | 0.941  | 148000 | 4 | 0 | 0 | 0 | 0 | 1 | 0 |
| Parus_major                     | Land Birds | Paridae         | 0.0158 | 10800  | 4 | 0 | 0 | 0 | 0 | 1 | 0 |
| Chersomanes_albofasciata        | Land Birds | Alaudidae       | 0.0494 | 5880   | 4 | 0 | 0 | 0 | 0 | 1 | 0 |
| Ammomanes_phoenicurus           | Land Birds | Alaudidae       | 0.0256 | 7230   | 4 | 0 | 0 | 0 | 0 | 1 | 0 |
| Calandrella_cinerea             | Land Birds | Alaudidae       | 0.0237 | 8790   | 4 | 0 | 0 | 0 | 0 | 1 | 0 |
| Eremophila_alpestris            | Land Birds | Alaudidae       | 0.0335 | 11800  | 4 | 0 | 0 | 0 | 0 | 1 | 0 |
| Galerida_cristata               | Land Birds | Alaudidae       | 0.0428 | 12200  | 4 | 0 | 0 | 0 | 0 | 1 | 0 |
| Alauda_arvensis                 | Land Birds | Alaudidae       | 0.0375 | 11200  | 4 | 0 | 0 | 0 | 0 | 1 | 0 |
| Lullula_arborea                 | Land Birds | Alaudidae       | 0.0269 | 9010   | 4 | 0 | 0 | 0 | 0 | 1 | 0 |
| Hirundo_rustica                 | Land Birds | Hirundinidae    | 0.018  | 8160   | 4 | 0 | 0 | 0 | 0 | 1 | 0 |
| Andropadus_importunus           | Land Birds | Pycnonotidae    | 0.0274 | 6010   | 4 | 0 | 0 | 0 | 0 | 1 | 0 |
| Pycnonotus_cafer                | Land Birds | Pycnonotidae    | 0.043  | 6740   | 4 | 0 | 0 | 0 | 0 | 1 | 0 |
| Pycnonotus_jocosus              | Land Birds | Pycnonotidae    | 0.0296 | 6590   | 4 | 0 | 0 | 0 | 0 | 1 | 0 |
| Donacobius_atricapillus         | Land Birds | Troglodytidae   | 0.0368 | 6630   | 4 | 0 | 0 | 0 | 0 | 1 | 0 |
| Chamaea_fasciata                | Land Birds | Sylviidae       | 0.0148 | 7400   | 4 | 0 | 0 | 0 | 0 | 1 | 0 |
| Sylvia_hortensis                | Land Birds | Sylviidae       | 0.0219 | 9650   | 4 | 0 | 0 | 0 | 0 | 1 | 0 |
| Sylvia_borin                    | Land Birds | Sylviidae       | 0.0182 | 9650   | 4 | 0 | 0 | 0 | 0 | 1 | 0 |
| Sylvia_atricapilla              | Land Birds | Sylviidae       | 0.0167 | 10500  | 4 | 0 | 0 | 0 | 0 | 1 | 0 |
| Cettia_cetti                    | Land Birds | Sylviidae       | 0.0134 | 6690   | 4 | 1 | 1 | 0 | 0 | 1 | 0 |
| Aegithalos_caudatus             | Land Birds | Aegithalidae    | 0.0086 | 7870   | 4 | 0 | 0 | 0 | 0 | 1 | 0 |
| Leptopocile_sophieae            | Land Birds | Aegithalidae    | 0.0069 | 4470   | 4 | 0 | 0 | 0 | 0 | 1 | 0 |
| Cisticola_juncidis              | Land Birds | Cisticolidae    | 0.0069 | 5060   | 4 | 1 | 0 | 0 | 0 | 1 | 0 |
| Orthotomus_sutorius             | Land Birds | Cisticolidae    | 0.0075 | 3140   | 4 | 0 | 0 | 0 | 0 | 1 | 0 |
| Prinia_inornata                 | Land Birds | Cisticolidae    | 0.007  | 4300   | 4 | 0 | 0 | 0 | 0 | 1 | 0 |
| Prinia_subflava                 | Land Birds | Cisticolidae    | 0.0087 | 3540   | 4 | 0 | 0 | 0 | 0 | 1 | 0 |
| Hippolais_caligata              | Land Birds | Sylviidae       | 0.0089 | 4700   | 4 | 0 | 0 | 0 | 0 | 1 | 0 |
| Acrocephalus_palustris          | Land Birds | Sylviidae       | 0.0115 | 7370   | 4 | 0 | 0 | 0 | 0 | 1 | 0 |
| Zosterops_palpebrosa            | Land Birds | Zosteropidae    | 0.0086 | 3040   | 4 | 0 | 0 | 0 | 0 | 1 | 0 |
| Pomatorhinus_schisticeps        | Land Birds | Timaliidae      | 0.043  | 14500  | 4 | 0 | 0 | 0 | 0 | 1 | 0 |
| Napothera_brevicaudata          | Land Birds | Timaliidae      | 0.0195 | 9820   | 4 | 0 | 0 | 0 | 0 | 1 | 0 |
| Turdoides_caudatus              | Land Birds | Timaliidae      | 0.0397 | 10900  | 4 | 1 | 0 | 0 | 0 | 1 | 0 |
| Liocichla_phoenicea             | Land Birds | Timaliidae      | 0.049  | 11300  | 4 | 0 | 0 | 0 | 0 | 1 | 0 |
| Promerops_cafer                 | Land Birds | Promeropidae    | 0.0349 | 7770   | 4 | 1 | 1 | 0 | 0 | 1 | 0 |
| Cyanomitra_olivacea             | Land Birds | Nectariniidae   | 0.0099 | 2640   | 4 | 1 | 0 | 0 | 0 | 1 | 0 |
| Arachnothera_longirostra        | Land Birds | Nectariniidae   | 0.0126 | 3100   | 4 | 0 | 0 | 0 | 0 | 1 | 0 |
| Arachnothera_magna              | Land Birds | Nectariniidae   | 0.0307 | 4930   | 4 | 0 | 0 | 0 | 0 | 1 | 0 |
| Irena_puella                    | Land Birds | Irenidae        | 0.0649 | 11800  | 4 | 1 | 1 | 0 | 0 | 1 | 0 |
| Prunella_modularis              | Land Birds | Prunellidae     | 0.0203 | 8770   | 4 | 1 | 1 | 0 | 0 | 1 | 0 |
| Passer_domesticus               | Land Birds | Passeridae      | 0.026  | 9640   | 4 | 0 | 0 | 0 | 0 | 1 | 0 |
| Montifringilla_nivalis          | Land Birds | Passeridae      | 0.0369 | 15000  | 4 | 0 | 0 | 0 | 0 | 1 | 0 |
| Motacilla_flava                 | Land Birds | Motacillidae    | 0.0177 | 10400  | 4 | 0 | 0 | 0 | 0 | 1 | 0 |
| Motacilla_cinerea               | Land Birds | Motacillidae    | 0.0172 | 9500   | 4 | 0 | 0 | 0 | 0 | 1 | 0 |
| Macronyx_croceus                | Land Birds | Motacillidae    | 0.0471 | 10200  | 4 | 0 | 0 | 0 | 0 | 1 | 0 |
| Anthus_novaeeseelandiae         | Land Birds | Motacillidae    | 0.0241 | 14000  | 4 | 0 | 0 | 0 | 0 | 1 | 0 |
| Anthus_trivialis                | Land Birds | Motacillidae    | 0.0234 | 12300  | 4 | 0 | 0 | 0 | 0 | 1 | 0 |
| Fringilla_coelebs               | Land Birds | Fringillidae    | 0.024  | 9650   | 4 | 0 | 0 | 0 | 0 | 1 | 0 |
| Fringilla_teydea                | Land Birds | Fringillidae    | 0.0303 | 4700   | 4 | 0 | 0 | 0 | 0 | 1 | 0 |
| Coccothraustes_coccothraustes   | Land Birds | Fringillidae    | 0.0567 | 10200  | 4 | 0 | 0 | 0 | 0 | 1 | 0 |
| Pimicola_enucleator             | Land Birds | Fringillidae    | 0.0564 | 15300  | 4 | 0 | 0 | 0 | 0 | 1 | 0 |
| Pyrrhula_pyrrhula               | Land Birds | Corvidae        | 0.0244 | 9000   | 4 | 0 | 0 | 0 | 0 | 1 | 0 |
| Carpodacus_erythrinus           | Land Birds | Fringillidae    | 0.024  | 10200  | 4 | 0 | 0 | 0 | 0 | 1 | 0 |
| Loxia_curvirostra               | Land Birds | Fringillidae    | 0.0385 | 9220   | 4 | 0 | 0 | 0 | 0 | 1 | 0 |
| Serinus_serinus                 | Land Birds | Fringillidae    | 0.0112 | 4550   | 4 | 0 | 0 | 0 | 0 | 1 | 0 |
| Carduelis_carduelis             | Land Birds | Fringillidae    | 0.016  | 6570   | 4 | 0 | 0 | 0 | 0 | 1 | 0 |
| Calcarius_lapponicus            | Land Birds | Emberizidae     | 0.0279 | 11800  | 4 | 0 | 0 | 0 | 0 | 1 | 0 |
| Plectrophenax_nivalis           | Land Birds | Emberizidae     | 0.0422 | 13500  | 4 | 0 | 0 | 0 | 0 | 1 | 0 |
| Cardinalis_cardinalis           | Land Birds | Cardinalidae    | 0.0427 | 13400  | 4 | 0 | 0 | 0 | 0 | 1 | 0 |
| Spiza_americana                 | Land Birds | Cardinalidae    | 0.0263 | 10000  | 4 | 1 | 0 | 0 | 1 | 0 | 0 |
| Dendroica_petechia              | Land Birds | Parulidae       | 0.0096 | 6400   | 4 | 0 | 0 | 0 | 0 | 1 | 0 |
| Protonotaria_citrea             | Land Birds | Parulidae       | 0.0143 | 9920   | 4 | 0 | 0 | 0 | 0 | 1 | 0 |
| Spizella_passerina              | Land Birds | Emberizidae     | 0.0122 | 6030   | 4 | 0 | 0 | 0 | 0 | 1 | 0 |
| Emberiza_calandra               | Land Birds | Emberizidae     | 0.0488 | 14700  | 4 | 1 | 1 | 0 | 0 | 1 | 0 |
| Agelaius_phoeniceus             | Land Birds | Icteridae       | 0.0524 | 14700  | 4 | 1 | 0 | 0 | 0 | 1 | 0 |
| Icterus_bullockii               | Land Birds | Icteridae       | 0.0379 | 12400  | 4 | 0 | 0 | 0 | 0 | 1 | 0 |
| Regulus_regulus                 | Land Birds | Regulidae       | 0.0056 | 5850   | 4 | 0 | 0 | 0 | 0 | 1 | 0 |
| Certhia_familiaris              | Land Birds | Certhiidae      | 0.009  | 7050   | 4 | 0 | 0 | 0 | 0 | 1 | 0 |
| Salpinctes_spilonotus           | Land Birds | Certhiidae      | 0.0148 | 4180   | 4 | 0 | 0 | 0 | 0 | 1 | 0 |
| Tichodroma_muraria              | Land Birds | Tichodromadidae | 0.0176 | 9410   | 4 | 0 | 0 | 0 | 0 | 1 | 0 |
| Sitta_europaea                  | Land Birds | Sittidae        | 0.0226 | 16600  | 4 | 0 | 0 | 0 | 0 | 1 | 0 |
| Polioptila_caerulea             | Land Birds | Polioptilidae   | 0.0058 | 3890   | 4 | 0 | 0 | 0 | 0 | 1 | 0 |
| Salpinctes_obsoletus            | Land Birds | Troglodytidae   | 0.0164 | 10600  | 4 | 0 | 0 | 0 | 0 | 1 | 0 |
| Campylorhynchus_brunneicapillus | Land Birds | Troglodytidae   | 0.0389 | 14700  | 4 | 0 | 0 | 0 | 0 | 1 | 0 |

|                             |            |                |        |       |   |   |   |   |   |   |   |
|-----------------------------|------------|----------------|--------|-------|---|---|---|---|---|---|---|
| Cistothorus_palustris       | Land Birds | Troglodytidae  | 0.0108 | 5120  | 4 | 1 | 1 | 0 | 1 | 0 | 0 |
| Troglodytes_troglodytes     | Land Birds | Troglodytidae  | 0.0098 | 8810  | 4 | 1 | 1 | 0 | 0 | 1 | 0 |
| Phainopepla_nitens          | Land Birds | Ptiligonatidae | 0.0221 | 7180  | 4 | 0 | 0 | 0 | 0 | 1 | 0 |
| Bombycilla_garrulus         | Land Birds | Bombycillidae  | 0.0545 | 17000 | 4 | 0 | 0 | 0 | 0 | 1 | 0 |
| Cinclus_cinclus             | Land Birds | Cinclidae      | 0.0617 | 21500 | 4 | 0 | 0 | 0 | 0 | 1 | 0 |
| Buphagus_erythrorhynchus    | Land Birds | Buphagidae     | 0.0508 | 8160  | 4 | 0 | 0 | 0 | 0 | 1 | 0 |
| Lampromornis_chalybaeus     | Land Birds | Sturnidae      | 0.087  | 19700 | 4 | 0 | 0 | 0 | 0 | 1 | 0 |
| Sturnus_vulgaris            | Land Birds | Sturnidae      | 0.0741 | 40500 | 4 | 1 | 1 | 0 | 0 | 1 | 0 |
| Onychognathus_morio         | Land Birds | Sturnidae      | 0.133  | 25600 | 4 | 0 | 0 | 0 | 0 | 1 | 0 |
| Dumetella_carolinensis      | Land Birds | Mimidae        | 0.0355 | 13100 | 4 | 0 | 0 | 0 | 0 | 1 | 0 |
| Mimus_polyglottos           | Land Birds | Mimidae        | 0.0485 | 15900 | 4 | 0 | 0 | 0 | 0 | 1 | 0 |
| Toxostoma_redivivum         | Land Birds | Mimidae        | 0.0844 | 19000 | 4 | 0 | 0 | 0 | 0 | 1 | 0 |
| Turdus_viscivorus           | Land Birds | Turdidae       | 0.118  | 29600 | 4 | 0 | 0 | 0 | 0 | 1 | 0 |
| Turdus_philomelos           | Land Birds | Turdidae       | 0.0678 | 26000 | 4 | 0 | 0 | 0 | 0 | 1 | 0 |
| Turdus_migratorius          | Land Birds | Turdidae       | 0.0785 | 23300 | 4 | 0 | 0 | 0 | 0 | 1 | 0 |
| Turdus_merula               | Land Birds | Turdidae       | 0.103  | 26500 | 4 | 0 | 0 | 0 | 0 | 1 | 0 |
| Muscicapa_striata           | Land Birds | Muscicapidae   | 0.0159 | 7740  | 4 | 0 | 0 | 0 | 0 | 1 | 0 |
| Copsychus_sularis           | Land Birds | Turdidae       | 0.036  | 14100 | 4 | 0 | 0 | 0 | 0 | 1 | 0 |
| Cercotrichas_coryphaeus     | Land Birds | Turdidae       | 0.0204 | 6540  | 4 | 0 | 0 | 0 | 0 | 1 | 0 |
| Cercotrichas_galactotes     | Land Birds | Turdidae       | 0.0203 | 12900 | 4 | 0 | 0 | 0 | 0 | 1 | 0 |
| Niltava_sundara             | Land Birds | Muscicapidae   | 0.0211 | 9410  | 4 | 0 | 0 | 0 | 0 | 1 | 0 |
| Cossypha_natalensis         | Land Birds | Turdidae       | 0.0341 | 8810  | 4 | 0 | 0 | 0 | 0 | 1 | 0 |
| Erithacus_rubecula          | Land Birds | Turdidae       | 0.0177 | 12300 | 4 | 0 | 0 | 0 | 0 | 1 | 0 |
| Brachypteryx_leucophrys     | Land Birds | Turdidae       | 0.0158 | 7880  | 4 | 0 | 0 | 0 | 0 | 1 | 0 |
| Hodgsonius_phoenicuroides   | Land Birds | Turdidae       | 0.0211 | 8090  | 4 | 0 | 0 | 0 | 0 | 1 | 0 |
| Luscinia_brunnea            | Land Birds | Turdidae       | 0.0175 | 7800  | 4 | 0 | 0 | 0 | 0 | 1 | 0 |
| Luscinia_megarhynchos       | Land Birds | Turdidae       | 0.0196 | 10600 | 4 | 0 | 0 | 0 | 0 | 1 | 0 |
| Tarsiger_cyanurus           | Land Birds | Turdidae       | 0.0135 | 7000  | 4 | 0 | 0 | 0 | 0 | 1 | 0 |
| Cinclidium_leucurum         | Land Birds | Turdidae       | 0.027  | 10900 | 4 | 0 | 0 | 0 | 0 | 1 | 0 |
| Saxicola_ferrea             | Land Birds | Turdidae       | 0.0149 | 7870  | 4 | 0 | 0 | 0 | 0 | 1 | 0 |
| Monticola_saxatilis         | Land Birds | Turdidae       | 0.0503 | 20000 | 4 | 0 | 0 | 0 | 0 | 1 | 0 |
| Monticola_cinctorhynchus    | Land Birds | Turdidae       | 0.036  | 15500 | 4 | 0 | 0 | 0 | 0 | 1 | 0 |
| Rhyacornis_fuliginosus      | Land Birds | Turdidae       | 0.0204 | 7600  | 4 | 0 | 0 | 0 | 0 | 1 | 0 |
| Chaimarrornis_leucocephalus | Land Birds | Turdidae       | 0.0304 | 11400 | 4 | 0 | 0 | 0 | 0 | 1 | 0 |
| Phoenicurus_ochruros        | Land Birds | Turdidae       | 0.0165 | 9750  | 4 | 0 | 0 | 0 | 0 | 1 | 0 |
| Phoenicurus_phoenicurus     | Land Birds | Turdidae       | 0.0146 | 10300 | 4 | 0 | 0 | 0 | 0 | 1 | 0 |
