# Supplementary material for: The Evolution of Diapsid Reproductive Strategy with Inferences about Extinct Taxa
Source: PubMed Central journal article supplement (PMC4938435; doi:10.1371/journal.pone.0158496), 2016-07-08
Supplement: pone.0158496.s002.pdf [file pone.0158496.s002.pdf]

## Reproductive Ecology References

Anderson, J. F., A. Hall-Martin, and D. A. Russell. 1985. Long-bone circumference and weight in mammals, birds and dinosaurs. *Journal of Zoology London (A)*207:53-61.

Antunes, M. T., P. Taquet, and V. Ribeiro. 1998. Upper Jurassic dinosaur and crocodile eggs from Pai Mogo nesting site (Lourinha - Portugal). *Memórias da Academia das Ciências de Lisboa* 37:83-99.

Clark, J. M., M. A. Norell, and L. M. Chiappe. 1999. An oviraptorid skeleton from the Late Cretaceous of Ukhaa Tolgod, Mongolia, preserved in an avianlike brooding position over an oviraptorid nest. *American Museum Novitates* 3265:1-36.

Davies, S. J. J. F. 2002. *Ratites and Tinamous*. S. J. J. F. Davies ed. Oxford University Press, Oxford.

Dong, Z. M., and P. J. Currie. 1996. On the discovery of an oviraptorid skeleton on a nest of eggs at Bayan Mandahu, Inner Mongolia, People's Republic of China. *Canadian Journal of Earth Sciences* 33:631-636.

Dunning, J. B. Jr. 2008. Avian Body Masses. Page 655 *in* J. B. Dunning, ed. CRC Press, Boca Raton.

Erickson, G. M., K. C. Rogers, D. J. Varricchio, M. A. Norell, and X. Xu. 2007. Growth patterns in brooding dinosaurs reveals the timing of sexual maturity in non-avian dinosaurs and genesis of the avian condition. *Biology Letters* 3:558-561.

Ferguson, M. W. J. 1985. Reproductive biology and embryology of the crocodylians. Page 451–460 *in* C. Gans, F. Billet, and P. F. A. Maderson ed. *Biology of the Reptilia*, John Wiley and Sons, New York.

- Grellet-Tinner G., Chiappe, L. M., Norell, M. and Bottjer, D. 2006. Dinosaur eggs and nesting ecology: A paleobiological investigation. *Palaeogeography, Palaeoclimatology, Palaeoecology* 232:294-321.
- Hackett, S. J., R. T. Kimball, S. Reddy, R. C. K. Bowie, E. L. Braun, M. J. Braun, J. L. Chojnowski, W. A. Cox, K. L. Han, J. Harshman, C. J. Huddleston, B. D. Marks, K. J. Miglia, W. S. Moore, F. H. Sheldon, D. W. Steadman, C. C. Witt, T. Yuri. 2008. A phylogenomic study of birds reveals their evolutionary history. *Science*, 320:1763-1767.
- Heinroth, O. 1922. Die Beziehungen zwischen Vogelgewicht, Eigewicht, Gelegegewicht und Brutdauer. *Journal of Ornithology* 70:172-285.
- Henderson, D. M. 1999. Estimating the masses and centers of mass of extinct animals by 3-D mathematical slicing. *Paleobiology* 25:88–106.
- Hirsch, K.F. and B. Quinn. 1990. Eggs and eggshell fragments from the Upper Cretaceous Two Medicine Formation of Montana. *Journal of Vertebrate Paleontology* 10:491-511.
- Horner, J. R. 1982. Evidence of colonial nesting and 'site fidelity' among ornithischian dinosaurs. *Nature* 297:675-676.
- Horner, J. R. 1984. The nesting behavior of dinosaurs. *Scientific American* 250(4):130-137.
- Horner, J. R. 1999. Egg clutches and embryos of two hadrosaurian dinosaurians. *Journal of Vertebrate Paleontology* 19:607-611.
- Hoyt, D. F. 1979. Practical methods of estimating volume and fresh weight of bird eggs. *Auk* 96:73-77.
- Iverson, J. B. and M. A. Ewert. 1991. Physical characteristics of reptilian eggs and a comparison with avian eggs. Pages 87-100 *in* D. C. Deeming and M. W. J. Ferguson ed. *Egg Incubation, Its*

Effects on Embryonic Development in Birds and Reptiles. Cambridge University Press, Cambridge.

Jackson, F. D., D. J. Varricchio, R. Jackson, B. Vila, and L. Chiappe. 2008. Water vapor conductance of a titanosaur egg (*Megaloolithus patagonicus*) from Argentina: comparison with a *Megaloolithus siruguei* egg from Spain. *Paleobiology* 34:229-246.

Jarvis, E. D. et al. 2014. Whole-genome analysis resolve early branches in the tree of life of modern birds. *Science* 346:1320-1331.

Jones, D. N., R. W. R. J. Dekker, and C. S. Roselaar. 1995. The Megapodes, Megapodiidae. D. N. Jones, R. W. R. J. Dekker and C. S. Roselaar, ed. Oxford University Press, Oxford.

Kitching, J. W. 1979. Preliminary report on a clutch of six dinosaurian eggs from the Upper Triassic Elliot Formation, Northern Orange Free State. *Palaeontologia Africana* 22:41-45.

Mateus, I. H., M. T. Antunes, O. Mateus, P. Tacquet, V. Ribeiro, and G. Manuppella. 1997. Couvee, oeufs et embryons d'un dinosaure theropode du Jurassique superieur de Lourinha. *Comptes Rendus de l'Academie des Sciences de Paris* 325(A):71-78.

Mikhailov, K. E., K. Sabath, and S. Kurzanov. 1994. Eggs and nests from the Cretaceous of Mongolia. Pages 88-115 in K. Carpenter, K.F. Hirsch, and J.R. Horner ed. *Dinosaur Eggs and Babies*. Cambridge University Press, New York.

Norell, M. A., J. M. Clark, L. M. Chiappe, and D. Dashzeveg. 1995. A nesting dinosaur. *Nature* 378:774-776.

Oring, Lewis W., E. M. Gray, and J. M. Michael Reed. 1997. Spotted Sandpiper (*Actitis macularius*), *The Birds of North America Online*. A. Poole, Ed. Ithaca: Cornell Lab of Ornithology; the Birds of North America Online.

- Paganelli, C. V., A. Olszowka, and A. Ar. 1974. The avian egg: surface area, volume, and density. *Condor* 76:319-325.
- Paul, G. S. 1988. *Predatory Dinosaurs of the World: A Complete Illustrated Guide*. G. S. Paul ed. Simon and Schuster, New York.
- Peczki, J. 1994. Implications of body-mass estimates for dinosaurs. *Journal of Vertebrate Paleontology* 14:520-533.
- Reisz, R. R., D. Scott, H.-D. Sues, D. C. Evans, and M. A. Raath. 2012. Embryos of an Early Jurassic prosauropod dinosaur and their evolutionary significance. *Science* 309:761-764.
- Russell, D. A. 1969. A new specimen of *Stenonychosaurus* from the Oldman Formation (Cretaceous) of Alberta. *Canadian Journal of Earth Sciences* 6:595-612.
- Russell, D. A., and R. Séguin. 1982. Reconstruction of the small Cretaceous theropod *Stenonychosaurus inequalis* and a hypothetical dinosaurid. *Syllogeus* 37:1-43.
- Sabath K. 1991. Upper Cretaceous amniotic eggs from the Gobi Desert. *Palaeontologica Polonica*. 36:151-192.
- Sander, P. M., C. Peitz, F. Jackson, and L. Chiappe. 2008. Upper Cretaceous titanosaur nesting sites and their implications for sauropod reproductive biology. *Palaentographica (A)* 284:69-107.
- Seddon, N., J. A. Tobias, and S. H. M. Butchart. 2003. Group living, breeding behaviour and territoriality in the Subdesert Mesite *Monias benschi*. *Ibis* 145:277-294.
- Shine, R. 1988. Parental care in reptiles. Pages 276-329 in C. Gans and R.B. Huey ed. *Biology of the Reptilia*, Volume 16, Ecology B., Branta Books, Ann Arbor, Michigan.
- Thorbjarnarson, J. B. 1996. Reproductive characteristics of the order Crocodylia. *Herpetologica* 52:8-24.

Trutnau, L. and Sommerlad, R. 2006. Crocodilians: their natural history and captive husbandry.

L. Trunau and R. Sommerlad ed. Chimaira, Frankfurt.

Varricchio, D. J., Jackson, F. D., Borkowski, J. and Horner, J. R. 1997. Nest and egg clutches of the dinosaur *Troodon formosus* and the evolution of avian reproductive traits. *Nature* 385:247-250.

Varricchio, D. J., Jackson, F.D., Jackson, R.A., and Zelenitsky, D.K. 2013. Porosity and water vapor conductance of two *Troodon formosus* eggs: an assessment of incubation strategy in a maniraptoran dinosaur. *Paleobiology* 39(2):278–296.

Walters, M. 1994. *Birds' Eggs*. M. Walters Ed. Dorling Kindersley, London.

Yang, R., X. Wu, P. Yan, X. Su, and B. Yang. 2010. Complete mitochondrial genome of *Otis tarda* (Gruiformes: Otididae) and phylogeny of Gruiformes inferred from mitochondrial DNA sequences. *Molecular Biology Reports* 37:3057-3066.
