# Supplementary material for: The Evolution of Diapsid Reproductive Strategy with Inferences about Extinct Taxa
Source: PubMed Central journal article supplement (PMC4938435; doi:10.1371/journal.pone.0158496), 2016-07-08
Supplement: pone.0158496.s003.pdf [file pone.0158496.s003.pdf]

## Supplementary File 2 - Phylogeny References

- Alström, P., P. G. P. Ericson. 2006. Phylogeny and classification of the avian superfamily Sylvioidea. *Molecular Phylogenetics and Evolution* 38:381-397.
- Barker, F. K., G. F. Barroclough, and J. G. Groth. 2002. A phylogenetic hypothesis for passerine birds: Taxonomic and biogeographic implications of an analysis of nuclear DNA sequence data. *Proceedings of the Royal Society of London B* 269:295-308.
- Bertelli, S., and A. L. Porzecanski. 2004. Tinamou (Tinamidae) systematics: A preliminary combined analysis of morphology and molecules. *Ornitologia Neotropical* 15(suppl.):1-7.
- Belbic, A. J., I. Seibolc, W. Bednarek, P. Gaucher, D. Ristow, W. Scharlau, D. Schmidl, and M. Wink. 1994. Phylogenetic relationships among Falcon species (genus *Falco*) according to DNA sequence variation of the cytochrome b gene. *In* B. Meyburg, and R. D. Chancellor ed. *Raptor Conservation Today* 593-599.
- Bridge, E. S., A. W. Jones, and A. J. Baker. 2005. A phylogenetic framework for the terns (Sternini) inferred from mtDNA sequences: Implications for taxonomy and plumage evolution. *Molecular Phylogenetics and Evolution* 35:459-469.
- Chesser, R. T. 2004. Molecular systematics of New World suboscine birds. *Molecular Phylogenetics and Evolution* 35:11-24.
- Crowe, T. M., P. Bloomer, E. Randi, V. Lucchini, R. Kimball, E. Braun, and J. G. Groth. 2006. Supra-generic cladistics of landfowl (Order Galliformes). *Acta Zoologica Sinica* 52(suppl.):358-361.
- Dowling, H. G., C. A. Hass, B. S. Hedges, and R. Highton. 1996. Snake relationships revealed by slow-evolving proteins: A preliminary survey. *Journal of the Zoological Society of London* 240:1-28.
- Driskell, A., L. Christidis, B. J. Gill, W. E. Boles, F. K. Barker, and N. W. Longmore. 2007. A new endemic family of New Zealand passerine birds: Adding heat to a biodiversity hotspot. *Australian Journal of Zoology* 55:73-78.
- Fain, M. G., and P. Houde. 2007. Multilocus perspectives on the monophyly and phylogeny of the order Charadriiformes (Aves). *BMC Evolutionary Biology*, 7(35):15.
- Fjeldså, J., M. Irestedt, P. G. P. Ericson, and D. Zuccon. 2010. The Cinnamon Ibon *Hypocryptadius cinnamomeus* is a forest canopy sparrow. *Ibis* 152:747-760.
- Gelang, M., A. Cibois, E. Pasquet, U. Olsson, P. Alström, and P. G. P. Ericson. 2009. Phylogeny of babblers (Aves, Passeriformes): Major lineages, family limits and classification. *Zoologica Scripta* 38:225-236.
- Gonzalez, J., H. Duttman, and M. Wink. 2009. Phylogenetic relationships based on two mitochondrial genes and hybridization patterns in Anatidae. *Journal of Zoology* 279:310-318.
- Griffiths, C. S., G. F. Barrowclough, J. G. Groth, and L. Mertz. 2004. Phylogeny of the Falconidae (Aves): A comparison of the efficacy of morphological, mitochondrial, and nuclear data. *Molecular Phylogenetics and Evolution* 32:101-109.

- Griffiths, C. S., G. F. Barrowclough, J. G. Groth, and L. A. Merts. 2007. Phylogeny, diversity, and classification of the Accipitridae based on DNA sequences and the RAG-1 exon. *Journal of Avian Biology* 38:587-602.
- Hackett, S. J., R. T. Kimball, S. Reddy, R. C. K. Bowie, E. L. Braun, M. J. Braun, J. L. Chojnowski, W. A. Cox, K. L. Han, J. Harshman, C. J. Huddleston, B. D. Marks, K. J. Miglia, W. S. Moore, F. H. Sheldon, D. W. Steadman, C. C. Witt, T. Yuri. 2008. A phylogenomic study of birds reveals their evolutionary history. *Science*, 320:1763-1767.
- Hall, K. S. S., and B. S. Tullberg. 2004. Phylogenetic analysis of the diversity of moult strategies in Sylviidae in relation to migration. *Evolutionary Ecology* 18:85-105.
- Han, K.-L., M. B. Robbins, and M. J. Braum. 2010. A multi-gene estimate of phylogeny in the nightjars and nighthawks (Caprimigulidae). *Molecular Phylogenetics and Evolution* 55(2):443-453.
- Irestedt, M., U. S. Johansson, T. J. Parsons, and P. G. P. Ericson. 2001. Phylogeny of major lineages of suboscine (Passeriformes) analyzed by nuclear DNA sequence data. *Journal of Avian Biology* 32:15-25.
- Jarvis, E. D. et al. 2014. Whole-genome analysis resolve early branches in the tree of life of modern birds. *Science* 346:1320-1331.
- Johansson, U. S., J. Fjeldså, and R. C. K. Bowie. 2008. Phylogenetic relationships within Passerida (Aves: Passeriformes): A review and a new molecular phylogeny based on three nuclear intron markers. *Molecular Phylogenetics and Evolution* 48:858-876.
- Johnson, K. P., and D. H. Clayton. 2000. Nuclear and mitochondrial genes contain similar phylogenetic signal for pigeons and doves (Aves: Columbiformes). *Molecular Phylogenetics and Evolution* 14(1):141-151.
- Jønsson, K. A., and J. Fjeldså. 2006. A phylogenetic supertree of oscine passerine birds (Aves: Passeri). *Zoologica Scripta* 35(2):149-186.
- Kelly, C. M. R., N. P. Barker, M. H. Villet, and D. G. Broadley. 2009. Phylogeny, biogeography and classification of the snake superfamily Elapoidea: A rapid radiation in the late Eocene. *Cladistics* 25:33-63.
- Kennedy, M., and R. D. M. Page. 2002. Seabird supertrees: Combining partial estimates of Procellariiform phylogeny. *The Auk* 119(1):88-108.
- Kennedy, M., and H. G. Spencer. 2004. Phylogenies of the Frigatebirds (Fregatidae) and Tropicbirds (Phaethonidae), two divergent groups of the traditional order Pelecaniformes, inferred from mitochondrial DNA sequences. *Molecular Phylogenetics and Evolution* 31:31-38.
- Klicka, J., K. Burns, and G. M. Spellman. 2007. Defining a monophyletic Cardinalini: A molecular perspective. *Molecular Phylogenetics and Evolution* 45:1014-1032.
- Krajewski, C., and J. W. Fetzner, Jr. 1994. Phylogeny of cranes (Gruiformes: Gruidae) based on Cytochrome-B DNA sequences. *The Auk* 111(2):351-365.
- Ksepka, D. T., S. Bertelli, and N. P. Giannini. 2006. The phylogeny of the living and fossil Sphenisciformes (penguins). *Cladistics* 22:412-441.
- Larsen, C., Speed, M., N. Harvey, and H. A. Noyes. 2007. A molecular phylogeny of the nightjars (Aves: Caprimigulidae) suggests extensive conservation of primitive morphological traits across multiple lineages. *Molecular Phylogenetics and Evolution* 42:789-796.

- Livezey, B. C. 2010. Phylogenetics of modern shorebirds (Charadriiformes) based on phenotypic evidence: Analysis and discussion. *Zoological Journal of the Linnean Society* 160:567-618.
- Malone, C. L., T. Wheeler, J. F. Taylor, and S. K. Davis. 2000. Phylogeography of the Caribbean Rock Iguana (*Cyclura*): Implications for conservation and insights on the biogeographic history of the West Indies. *Molecular Phylogenetics and Evolution* 17(2):269-279.
- Mayr, G., 2002. Osteological evidence for paraphyly of the avian order Caprimiguliformes (nightjars and allies). *Journal of Ornithology* 143:82-97.
- Melville, J., and J. M. Hale. 2009. Length variation in the N-terminal domain of the recombination-activating gene 1 (RAG1) across squamates. *Molecular Phylogenetics and Evolution* 52:898-903.
- Moyle, R., G., R. T. Chesser, R. O. Prum, P. Schikler, and J. Cracraft. 2006. Phylogeny and evolution history of Old World Suboscine birds (Aves: Eurylaimides). *American Museum Novitates* 3544:22
- Moyle, R. G., J. Cracraft, M. Lakim, J. Nais, and F. H. Sheldon. 2006. Reconsideration of the phylogenetic relationships of the enigmatic Bornean Bristlehead (*Pityriasis gymnocephala*). *Molecular Phylogenetics and Evolution* 39:893-898.
- Moyle, R. G., R. T. Chesser, R. T. Brumfield, J. G. Tello, D. J. Marchese, and J. Cracraft. 2009. Phylogeny and phylogenetic classification of the antbirds, ovenbirds, woodcreepers, and allies (Aves: Passeriformes: infraorder Furnariides). *Cladistics* 25:386-405.
- Naro-Maciel, E., M. Le, N. N. Fitz Simmons, and G. Amato. 2008. Evolutionary relationships of marine turtles: A molecular phylogeny based on nuclear and mitochondrial genes. *Molecular Phylogenetics and Evolution* 49:659-662.
- Nylander, J. A. A., U. Olsson, P. Alstrom, and I. Sanmartin. 2008. Accounting for phylogenetic uncertainty in biogeography: A Bayesian approach to dispersal-vicariance analysis of the thrushes (Aves: *Turdus*). *Systematic Biology* 57(2):257-268.
- Oakes, E. J. 1992. Lekking and the evolution of sexual dimorphism in birds: Comparative approaches. *The American Naturalist* 140(4):665-684.
- Ohlson, J., J. Fjeldså, and P. G. P. Ericson. 2008. Tyrant flycatchers coming out in the open: phylogeny and ecological radiation of Tyrannidae (Aves, Passeriformes). *Zoologica Scripta* 37(3):315-335.
- Pasquet, E., J. M. Pons, J. Fuchs, C. Cruaud, and V. Bretagnolle. 2007. Evolutionary history and biogeography of the drongos (Dicruridae), a tropical Old World clade of corvid passerines. *Molecular Phylogenetics and Evolution* 45:158-167.
- Pereira, S. L., A. L. Baker. 2008. DNA evidence for a Paleocene origin of the Alcidae (Aves: Charadriiformes) in the Pacific and multiple dispersals across northern oceans. *Molecular Phylogenetics and Evolution* 46:430-445.
- Pitra, C., D. Leickfeldt, S. Frahnert, and J. Fickel. 2002. Phylogenetic relationships and ancestral areas of the bustards (Gruiformes: Otididae), inferred from mitochondrial DNA and nuclear intron sequences. *Molecular Phylogenetics and Evolution* 23(1):63-74.
- Poe, S. 1996. Data set incongruence and the phylogeny of crocodylians: *Systematic Biology* 45(4):393-414.

- Pons, J.-M., A. Hassanin, and P. A. Crochet. 2005. Phylogenetic relationships within the Laridae (Charadriiformes: Aves) inferred from mitochondrial markers. *Molecular Phylogenetics and Evolution* 35:686-699.
- Pyron, R. A., F. T. Burbrink, G. R. Colli, A. N. Montes de Oca, L. J. Vitt, C. A. Kuczynski, and J. J. Weins. 2010. The phylogeny of advanced snakes (Colubroidea), with discovery of a new subfamily and comparison of support methods for likelihood trees. *Molecular Phylogenetics and Evolution* 58(2):329-342.
- Rawlings, L. H., D. L. Rabosky, S. C. Donnellan, and M. N. Hutchinson. 2008. Python phylogenetics: Inference from morphology and mitochondrial DNA. *Biological Journal of the Linnean Society* 93:603-619.
- Sangster, G., J. M. Collinson, A. G. Knox, D. T. Parkin, and L. Svensson. 2010. Taxonomic recommendations for British birds: Sixth report. *Ibis* 152:180-186.
- Sheldon, F. H., and B. Slikas. 1997. Advances in Ciconiiform systematics 1976-1996. *Colonial Waterbirds* 20(1):106-114.
- Sheldon, F. H. 1987. Phylogeny of Herons estimated from DNA-DNA hybridization data. *The Auk* 104(1):97-108.
- Sibley, C. G., and J. E. Ahlquist. 1990. *Phylogeny and classification of birds*. C.G. Sibley and J. E. Ahlquist ed. New Haven, Yale University Press.
- Slikas, B., S. L. Olson, and R. C. Fleischer. 2002. Rapid, independent evolution of flightlessness in four species of Pacific Island rails (Rallidae): an analysis based on mitochondrial sequence data. *Journal of Avian Biology* 33:5-14.
- Sorenson, M. D., and R. B. Payne. 2001. A single ancient origin of brood parasitism in African finches: Implication so host-parasite coevolution. *Evolution* 55(12):2550-2567.
- Thomas, G. H., M. A. Wills, and T. Székely. 2004. A supertree approach to shorebird phylogeny: *BMC Evolutionary Biology* 4(28):18.
- Thomson, R. C. and H. B. Shaffer. 2010. Sparse supermatrices for phylogenetic inference: Taxonomy, alignment, rogue taxa and the phylogeny of living turtles. *Systematic Biology* 59(1):42-58.
- Treplin, S., R. Seigert, C. Bleidom, H. S. Thompson, R. Fotso, and R. Tiedemann. 2008. Molecular phylogeny of songbirds (Aves: Passeriformes) and the relative utility of common nuclear marker loci. *Cladistics* 24:328-349.
- Trewick, S. A. 1997. Flightlessness and phylogeny amongst endemic rails (Aves: Rallidae) of the New Zealand region. *Philosophical Transactions of the Royal Society of London B*. 352:429-446.
- Voelker, G., and S. V. Edwards. 1998. Can weighting improve bushy trees? Models of Cytochrome b evolution and the molecular systematics of pipits and wagtails (Aves: Motacillidae). *Systematic Biology* 47(4):589-603.
- Walther, B. A., and D. H. Clayton. 2005. Elaborate ornaments are costly to maintain: evidence for high maintenance handicaps. *Behavioral Ecology* 16(1):89-95.
- Wink, M. 1995. Phylogeny of Old and New World vultures (Aves: Accipitridae and Cathartidae) inferred from nucleotide sequences of the mitochondrial Cytochrome b gene. *Verlag der Zeitschrift für Naturforschung* 50:868-882.

- Wink, M. and I. Seibold. 1996: Molecular phylogeny of Mediterranean raptors (families Accipitridae and Falconidae). *Biología y Conservación de las Rapaces Mediterráneas* 334-344.
- Yang, R., X. Wu, P. Yan, X. Su, and B. Yang. 2010. Complete mitochondrial genome of *Otis tarda* (Gruiformes: Otididae) and phylogeny of Gruiformes inferred from mitochondrial DNA sequences. *Molecular Biology Reports* 37:3057-3066.
- Yom-Tov, Y., and E. Geffen. 2005. On the origin of brood parasitism in altricial birds. *Behavioral Ecology* 17(2):196-206.
- Zuccon, D., and P. G. P. Ericson. 2010. A multi-gene phylogeny disentangles the chat-flycatcher complex (Aves: Muscicapidae). *Zoologica Scripta* 39(3):213-224.
