# Supplementary material for: The Evolution of Diapsid Reproductive Strategy with Inferences about Extinct Taxa
Source: PubMed Central journal article supplement (PMC4938435; doi:10.1371/journal.pone.0158496), 2016-07-08

A

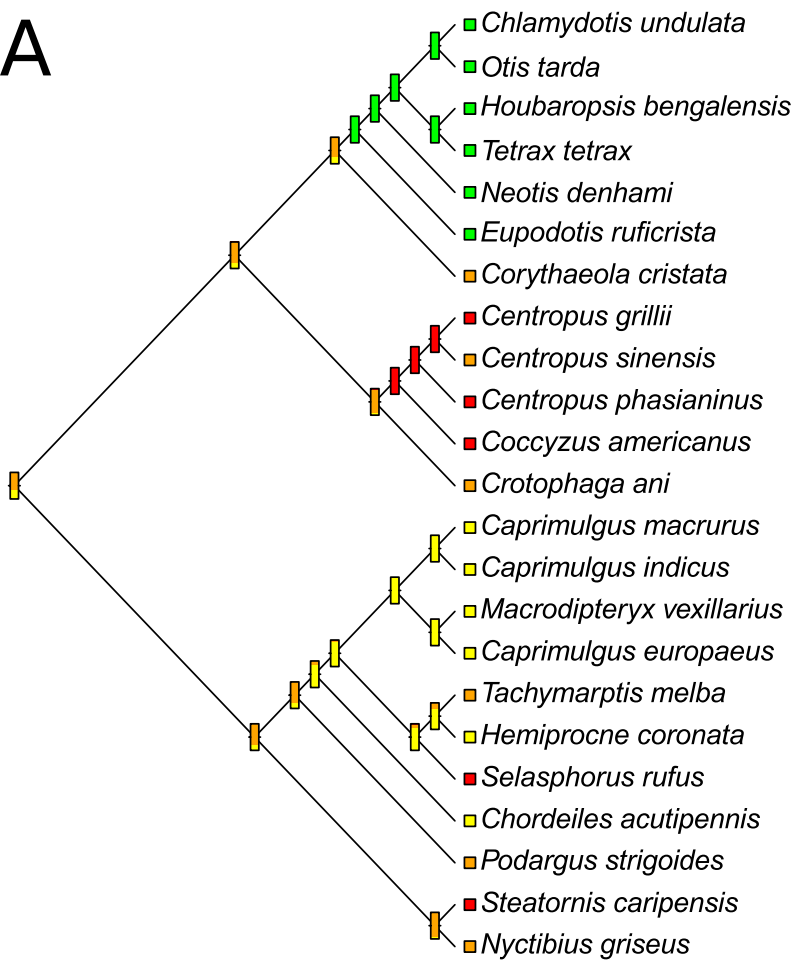

B

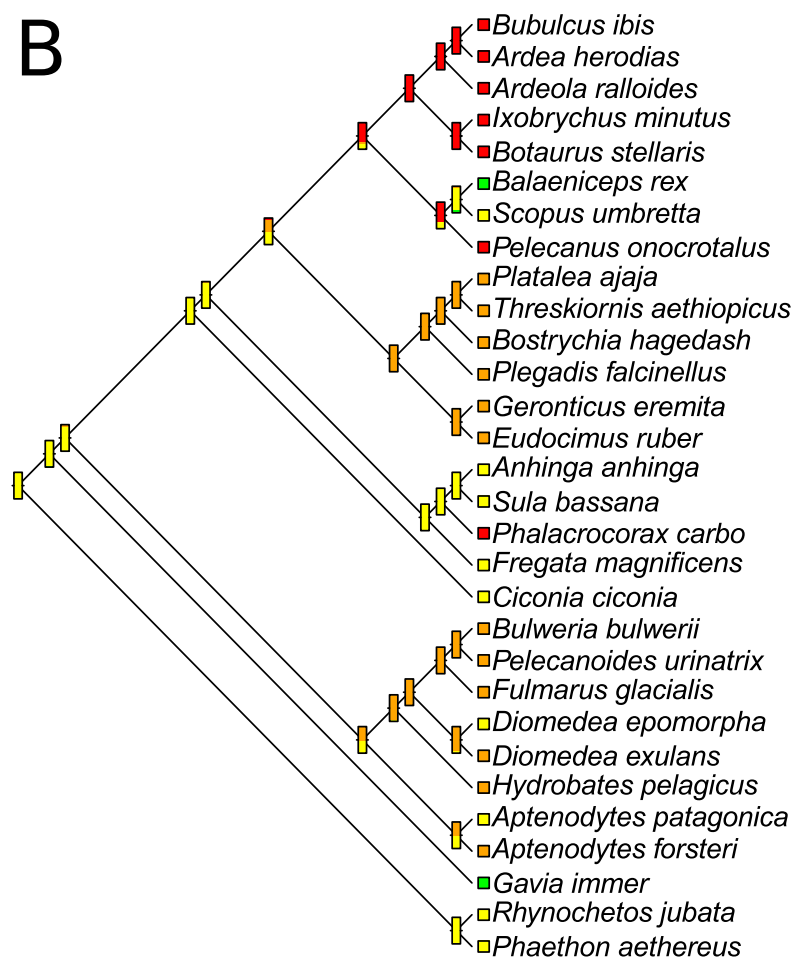

Supplement: pone.0158496.s009.pdf [file pone.0158496.s009.pdf]
