# Supplementary material for: The Evolution of Diapsid Reproductive Strategy with Inferences about Extinct Taxa
Source: PLoS One. 2016 Jul 8;11(7):e0158496. doi: 10.1371/journal.pone.0158496 (PMC4938435; doi:10.1371/journal.pone.0158496)
Supplement: S5 File — (PDF) [file pone.0158496.s005.pdf]

|                                    | Body mass (kg) | Clutch volume | Log <sub>10</sub> egg volume | Precocity           | No Care Predicted | Substrate Cared For | Maternal Care Predicted | Biparental Care Predicted | Paternal Care Predicted | Evidence ratio |
|------------------------------------|----------------|---------------|------------------------------|---------------------|-------------------|---------------------|-------------------------|---------------------------|-------------------------|----------------|
| <i>Citipati osmkoskoe</i>          | 79.23          | 8767000       | 1.89888986                   | 0.942851007         | 1                 | 6.362626357         | 0.336660644             | 6.581973987               | 0.130232223             |                |
| <i>Macharosaurus philocercatus</i> | 39.39          | 7141000       | 1.591064607                  | 0.637689212         | 1                 | 6.151480944         | 0.493109092             | 6.370828574               | 0.233163088             |                |
| <i>Troodon formosus</i>            | 51.4           | 7114000       | 1.710963119                  | 0.652113861         | 1                 | 6.233722532         | 0.382407836             | 6.453070162               | 0.159235874             |                |
| <i>Byronasaurus jaffei</i>         | 22.5           | 3240000       | 1.352182518                  | 0.615054501         | 1                 | 5.987625345         | 0.247344976             | 6.206972975               | 0.092155598             |                |
| Total Sum of Squares               | AIC            |               | Delta AIC                    | Relative likelihood | W <sub>i</sub>    | Evidence ratio      |                         |                           |                         |                |
| No Care                            | 1.485622547    | 3.891664858   | 0.163344094                  | 0.045882475         | 0.031055573       | 21.7948139          |                         |                           |                         |                |
| Maternal Care                      | 0.614787165    | 1.244725699   | 3.516404935                  | 0.172354398         | 0.116658148       | 5.801998735         |                         |                           |                         |                |
| Paternal Care                      | 0.190402672    | -2.271679236  | 0                            | 1                   | 0.67685043        |                     |                         |                           |                         |                |
| Biparental Care                    | 0.468370229    | 0.428674509   | 2.700353745                  | 0.259194412         | 0.175435849       | 3.858107864         |                         |                           |                         |                |
|                                    |                |               |                              | 1.477431285         |                   |                     |                         |                           |                         |                |

|                              | Body Mass (kg) | Catch Volume | log <sub>10</sub> (Survival) | Recallability | No Care Predicted | Substrate Care Predicted | Maternal Care Predicted | Paternal Care Predicted | Joint Care Predicted | Supplemental Care Predicted |
|------------------------------|----------------|--------------|------------------------------|---------------|-------------------|--------------------------|-------------------------|-------------------------|----------------------|-----------------------------|
| Lamprosomairine              | 2048           | 92180000     | 3.310055738                  | 7.964636704   | 3                 | 7.138738843              | 0.682107277             | 7.358086473             | 0.367903183          | 7.536455633                 |
| <i>Malaosara peeblesorum</i> | 2402           | 14400000     | 3.381656483                  | 7.158362492   | 3                 | 7.187851704              | 0.000869614             | 7.407199334             | 0.061919774          | 7.585568494                 |
| Total Sum of Squares         | AIC            | Delta AIC    | Relative likelihood          | Wi            | Evidence ratio    |                          |                         |                         |                      |                             |
| No Care                      | 0.68297689     | 1.560280368  | 1.872762051                  | 0.392044069   | 0.128276997       |                          |                         | 2.550733655             |                      |                             |
| Paternal Care                | 0.429822957    | -0.429822957 | 0.483499166                  | 0.171017482   | 0.256935071       |                          |                         | 1.734752523             |                      |                             |
| No Care                      | 0.365843998    | -0.312481683 | 0                            | 1             | 0.327200455       |                          |                         |                         |                      |                             |
| Biparental Care              | 0.398711307    | -0.05438986  | 0.258091824                  | 0.878933611   | 0.287587477       |                          |                         | 1.137742359             |                      |                             |
|                              |                |              |                              | 0.306230474   |                   |                          |                         |                         |                      |                             |

[illegible]
